# Supplementary material for: The molecular anti-metastatic potential of CBD and THC from Lebanese Cannabis via apoptosis induction and alterations in autophagy
Source: PubMed Central journal article supplement — Sci Rep. 2024 Oct 27;14:25642. doi: 10.1038/s41598-024-76340-x (PMC11514238; doi:10.1038/s41598-024-76340-x), 2024-10-27

**The molecular anti-metastatic potential of CBD and  
THC from Lebanese Cannabis via apoptosis induction  
and alterations in autophagy**

Full-length blots

**Full-length blots of proteins reported in Figure 4**

**Panel 1 represents western blot analysis shown in Fig. 4 C**

Repeat 1

Repeat 2

Repeat 3

PARP  
89, 116kDa

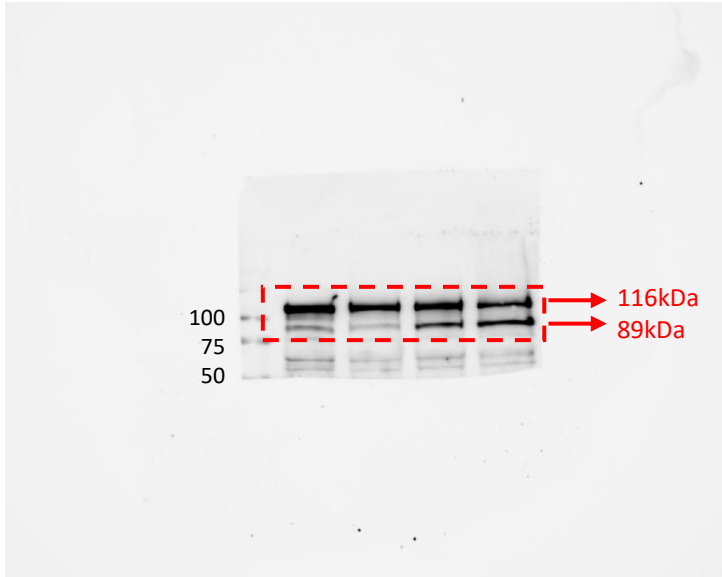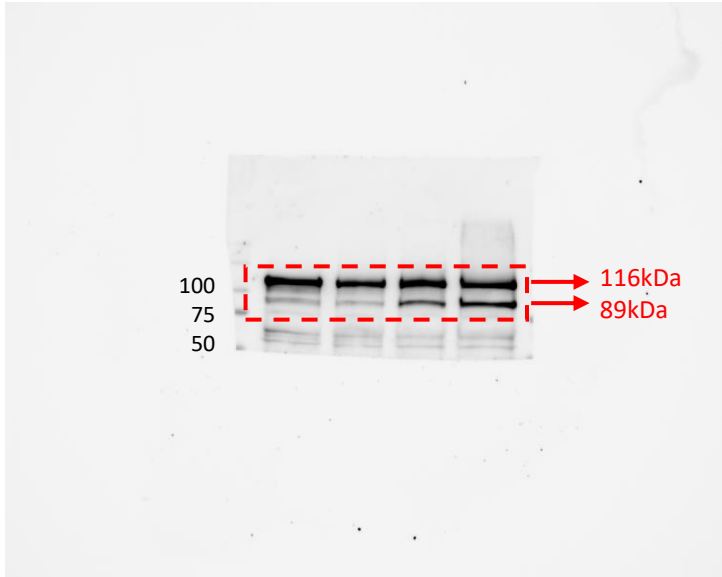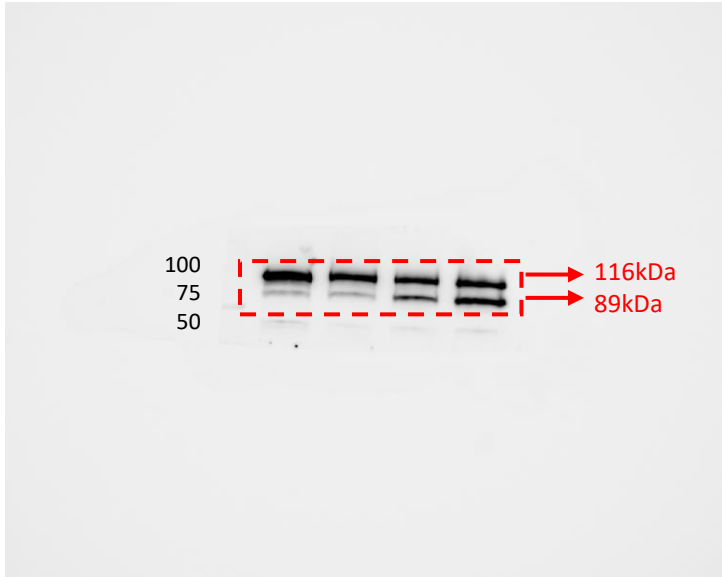

$\beta$ -actin  
42kDa

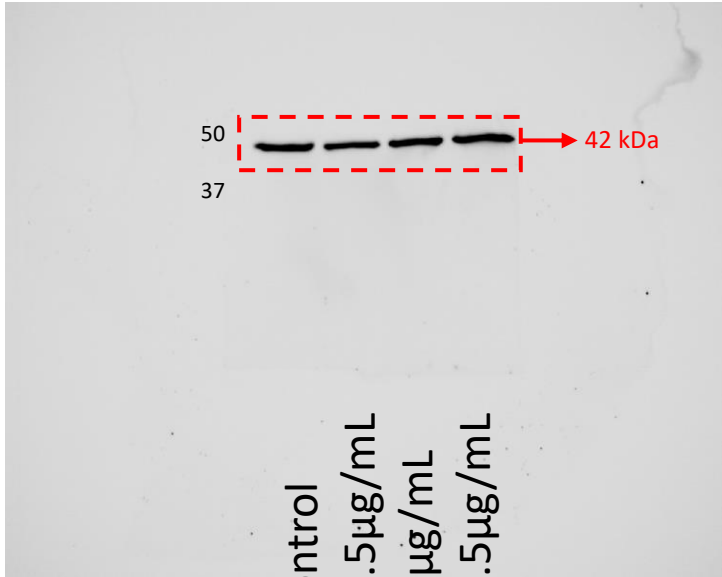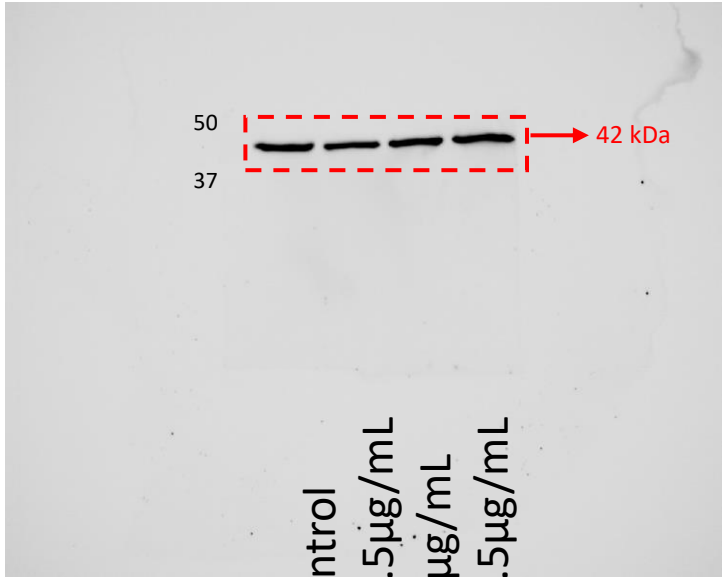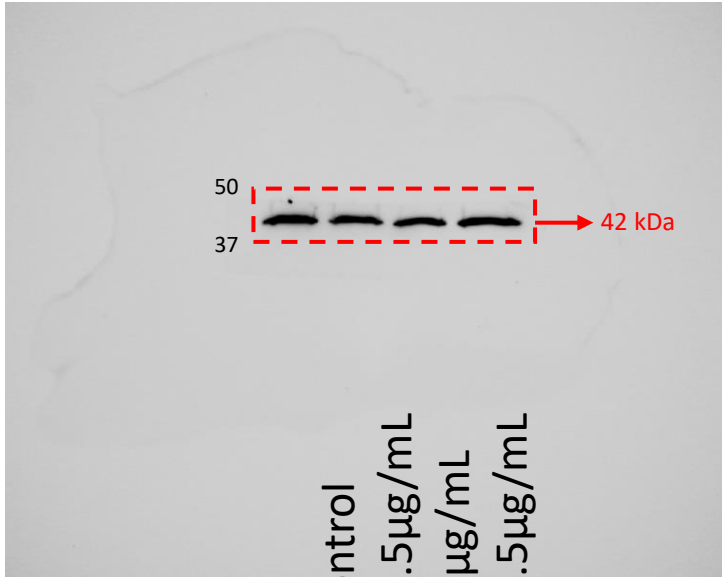

**Panel 2 represents western blot analysis shown in Fig. 4 C**

Repeat 1

Repeat 2

Repeat 3

PARP  
89, 116kDa

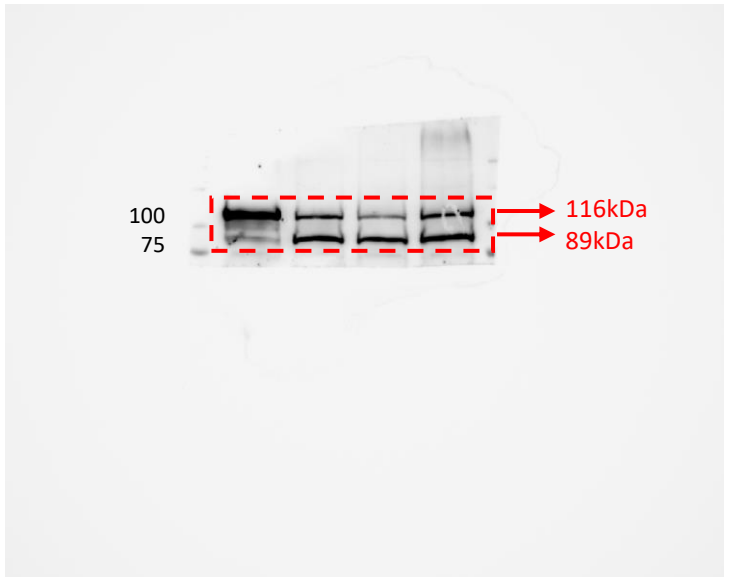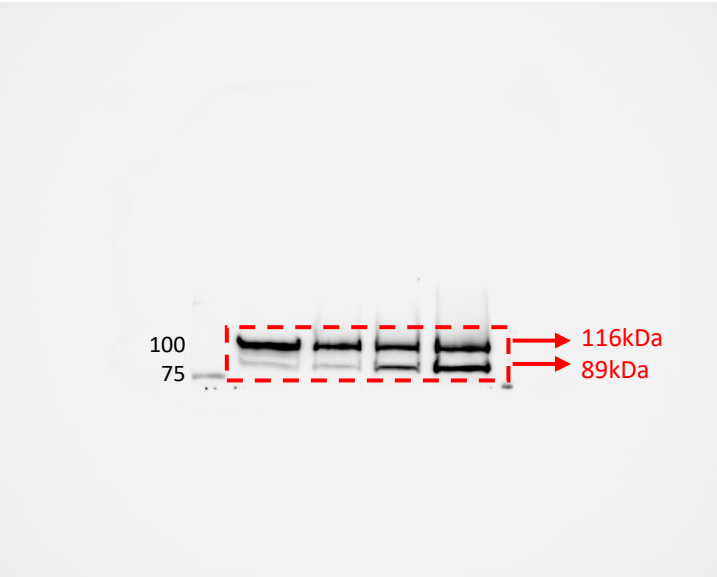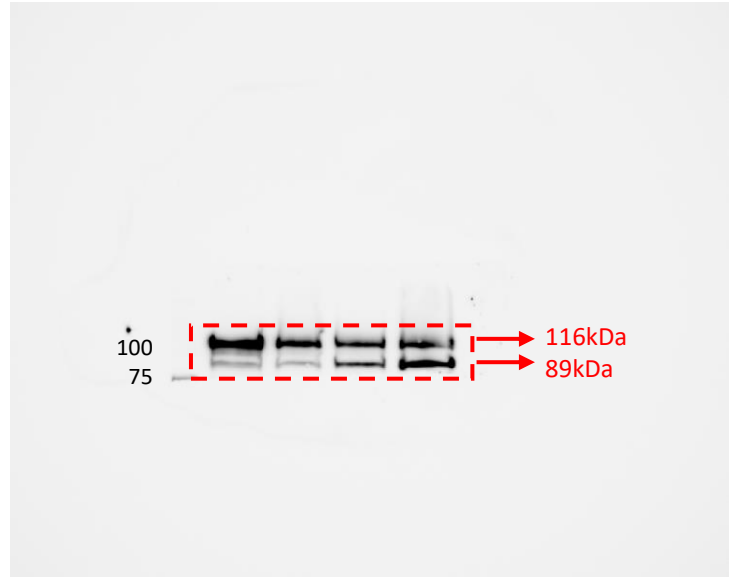

$\beta$ -actin  
42kDa

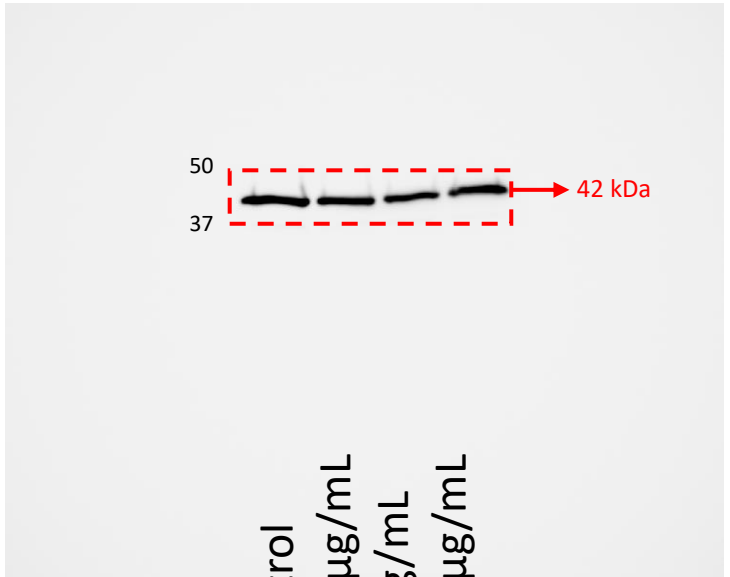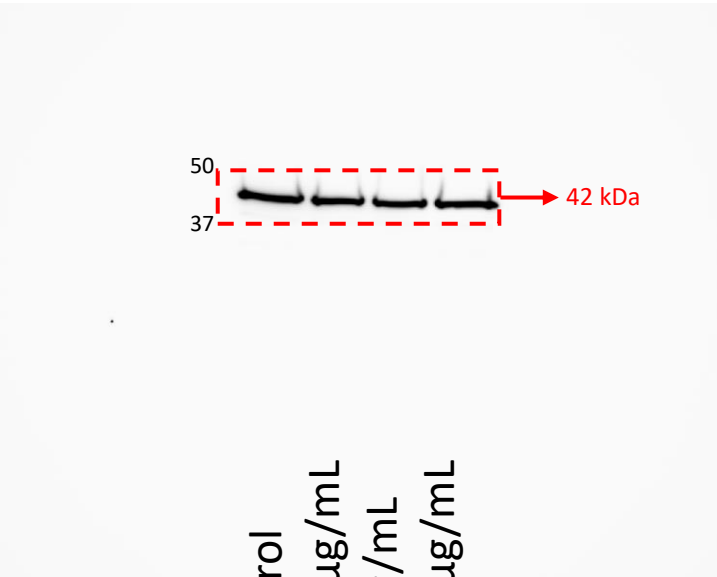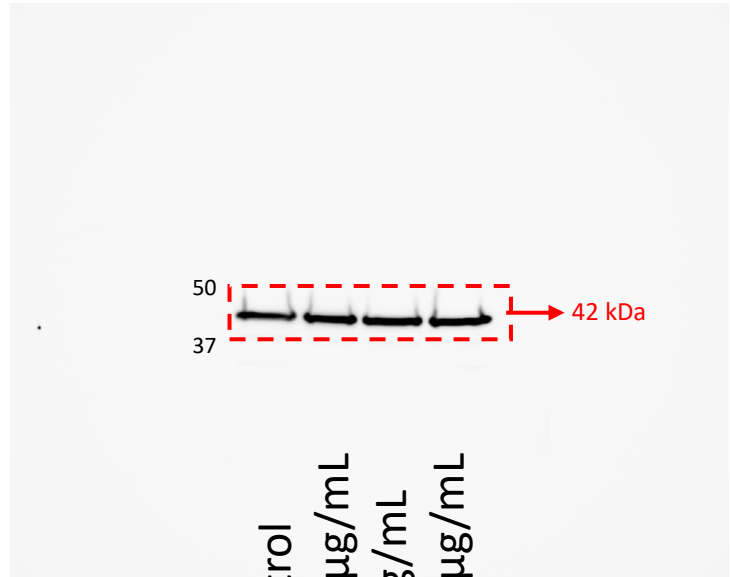

Control  
12.5 $\mu$ g/mL  
15 $\mu$ g/mL  
17.5 $\mu$ g/mL

Control  
12.5 $\mu$ g/mL  
15 $\mu$ g/mL  
17.5 $\mu$ g/mL

Control  
12.5 $\mu$ g/mL  
15 $\mu$ g/mL  
17.5 $\mu$ g/mL

**Full-length blots of proteins reported in Figure 5**

**Panel 3 represents western blot analysis shown in Fig. 5 A**

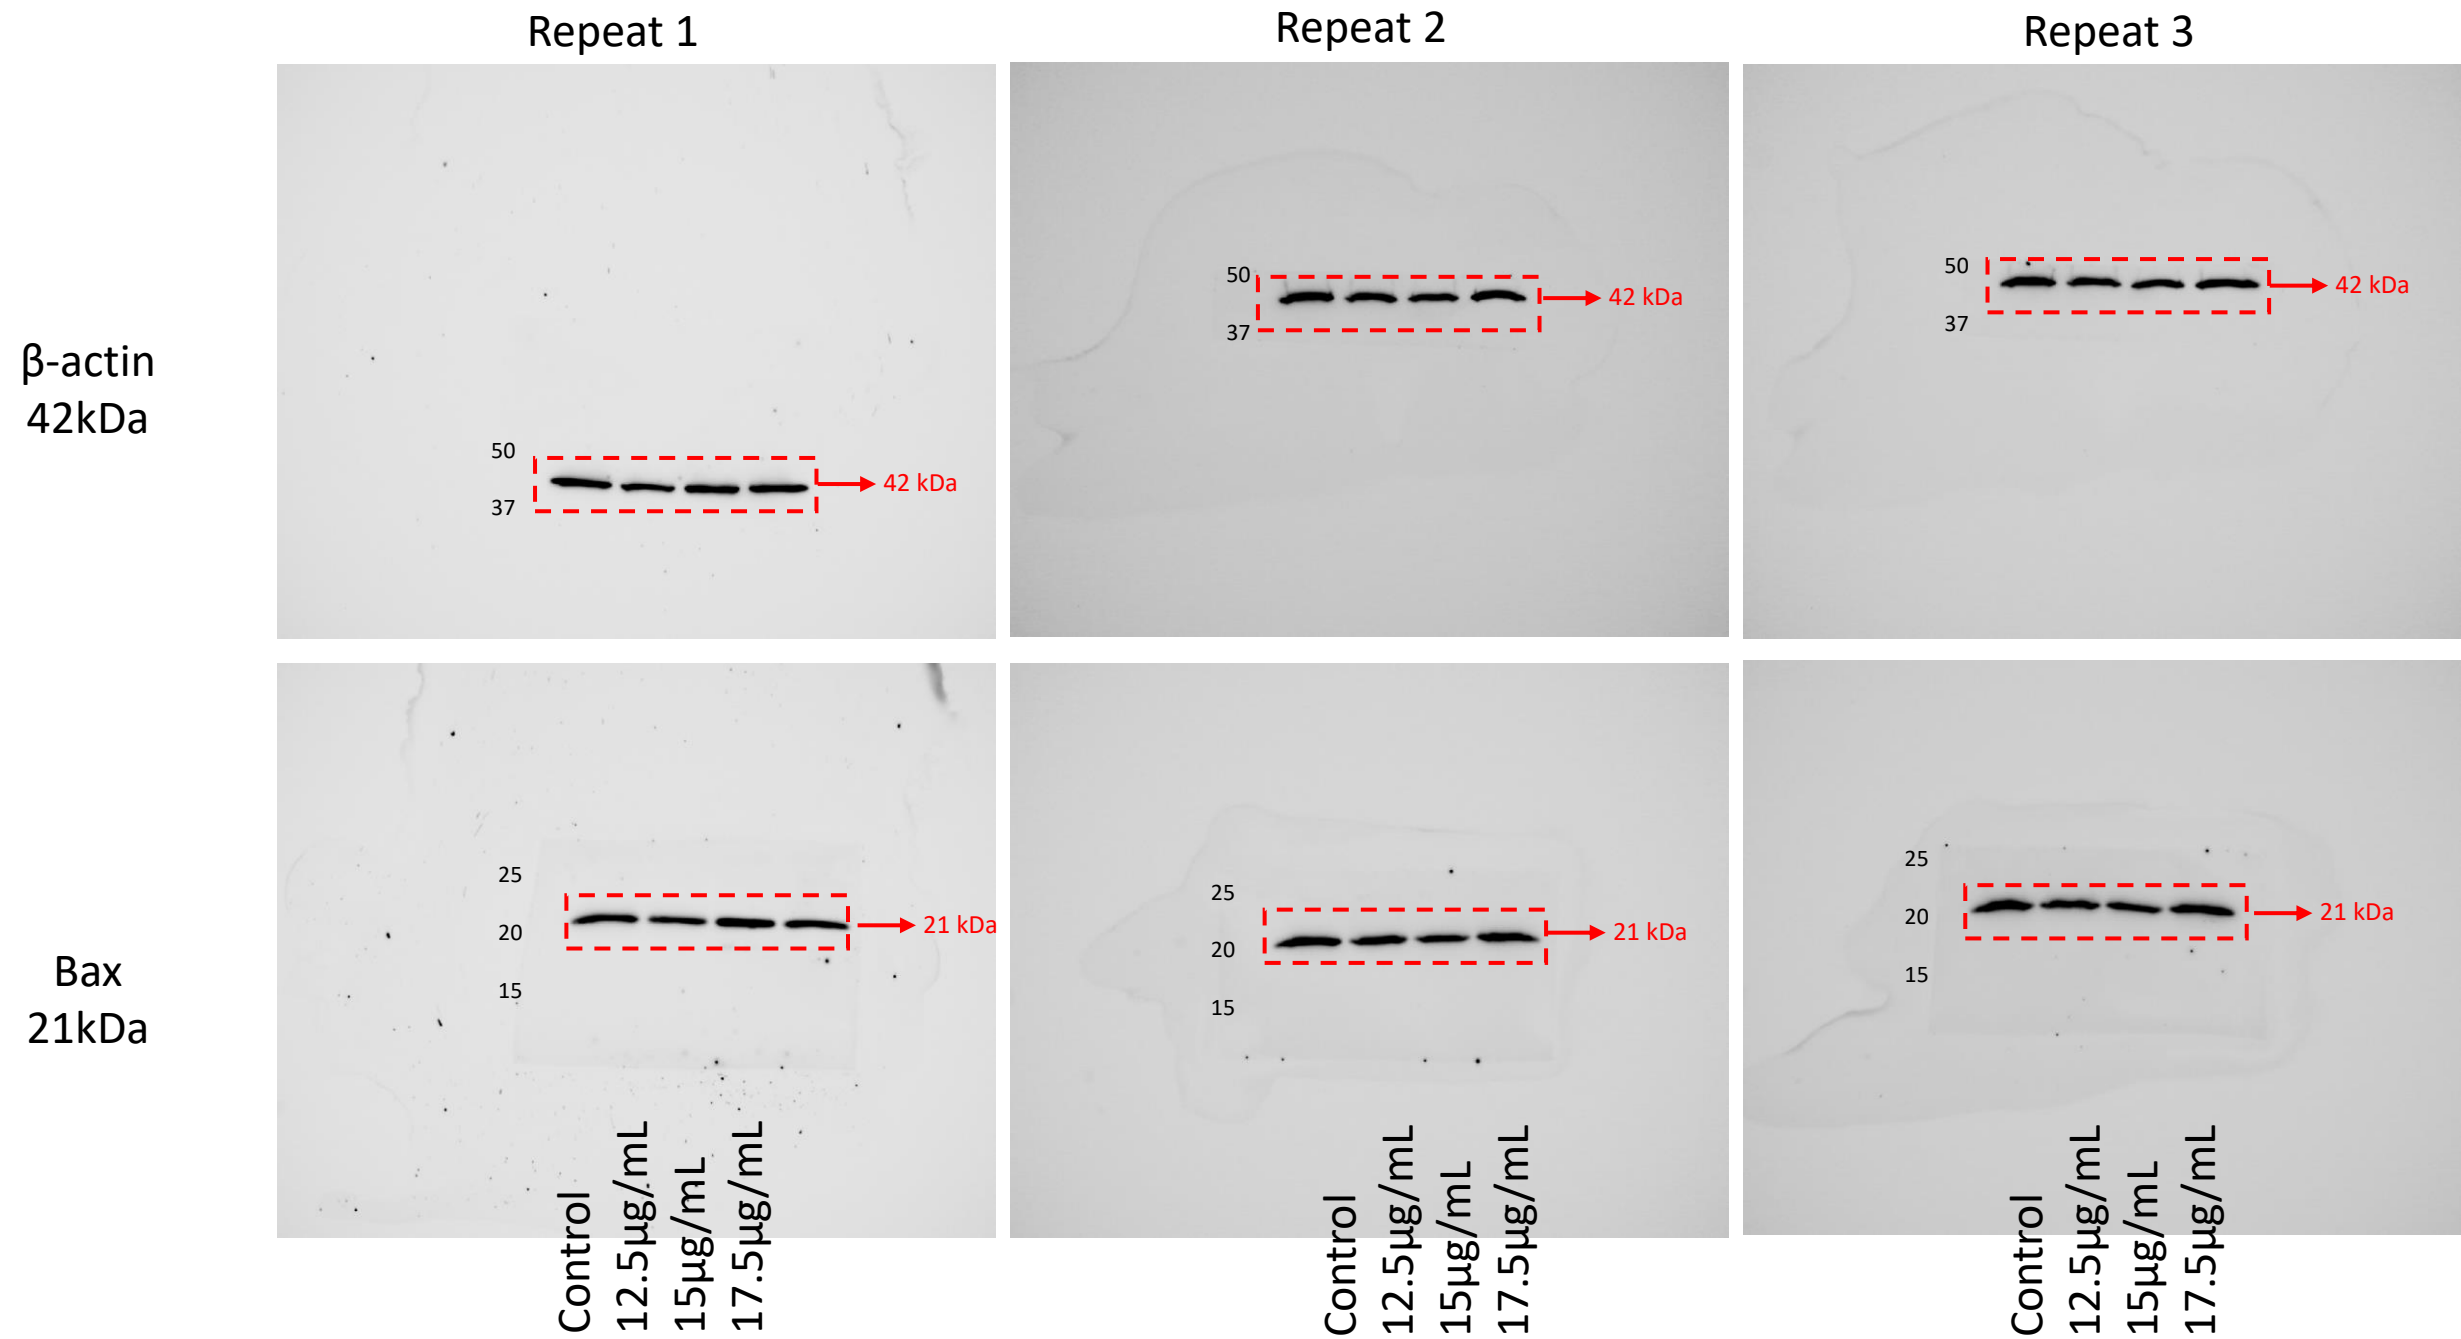

**Panel 4 represents western blot analysis shown in Fig. 5 A**

Repeat 1

Repeat 2

Repeat 3

$\beta$ -actin  
42kDa

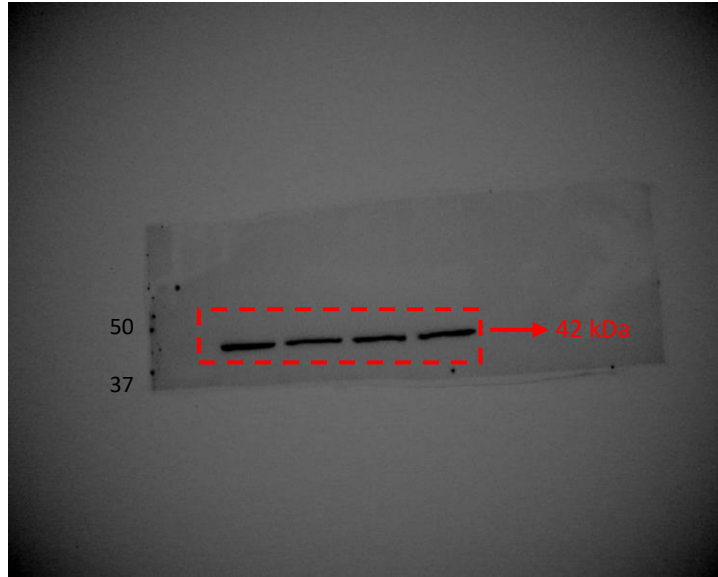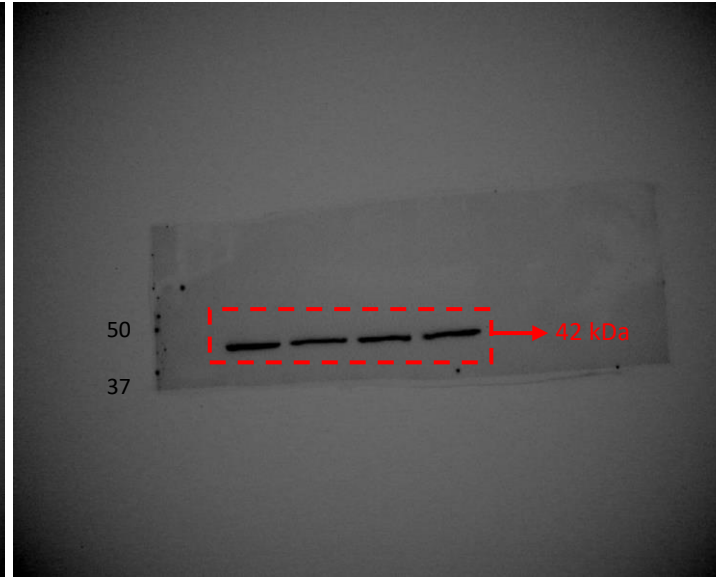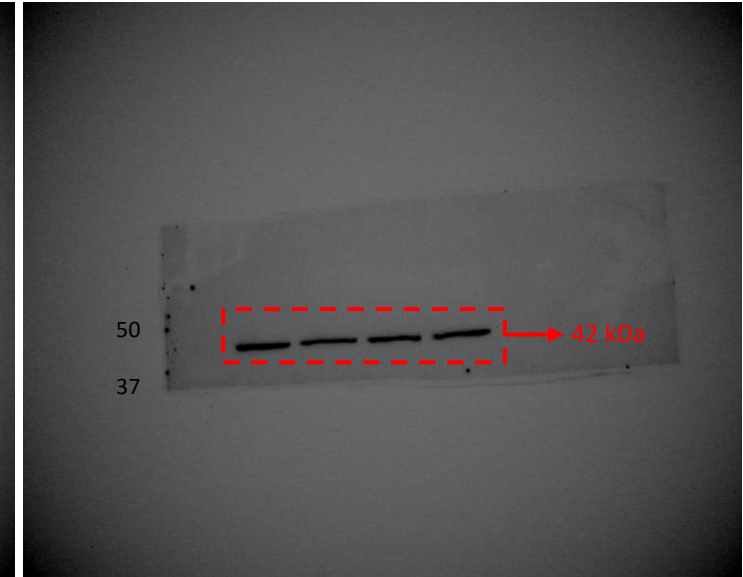

Bax  
21kDa

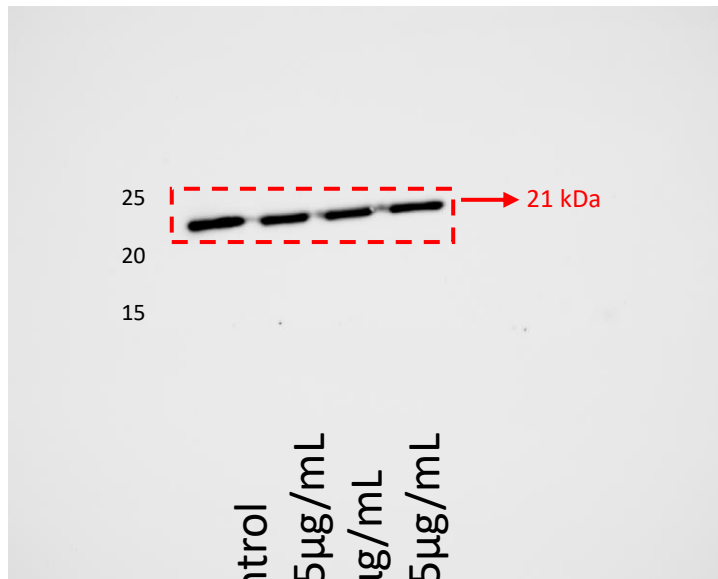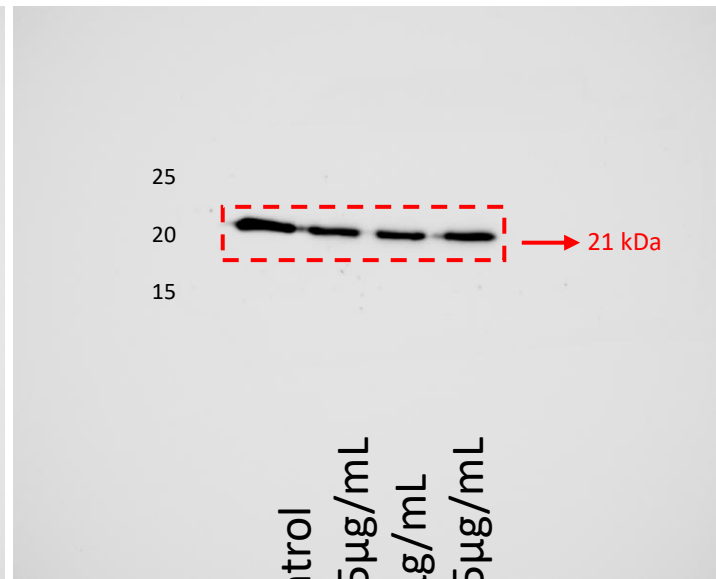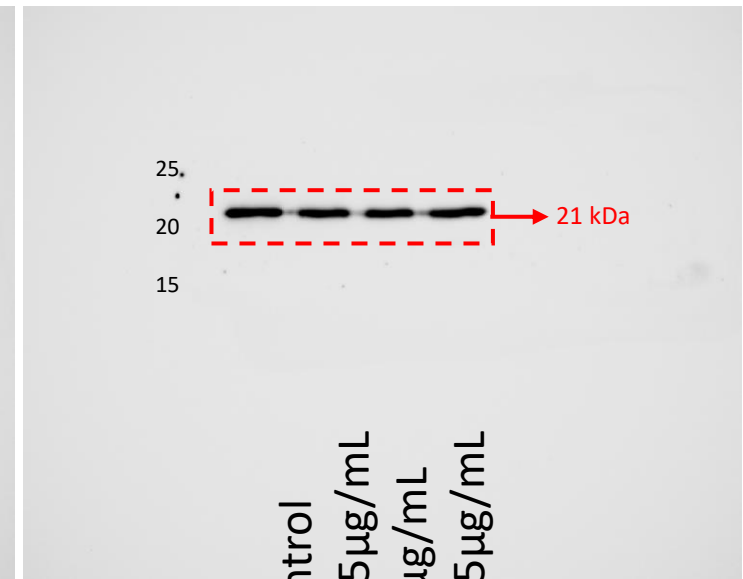

Control  
12.5  $\mu$ g/mL  
15  $\mu$ g/mL  
17.5  $\mu$ g/mL

Control  
12.5  $\mu$ g/mL  
15  $\mu$ g/mL  
17.5  $\mu$ g/mL

Control  
12.5  $\mu$ g/mL  
15  $\mu$ g/mL  
17.5  $\mu$ g/mL

**Panel 5 represents western blot analysis shown in Fig. 5 A**

Repeat 1

Repeat 2

Repeat 3

$\beta$ -actin  
42kDa

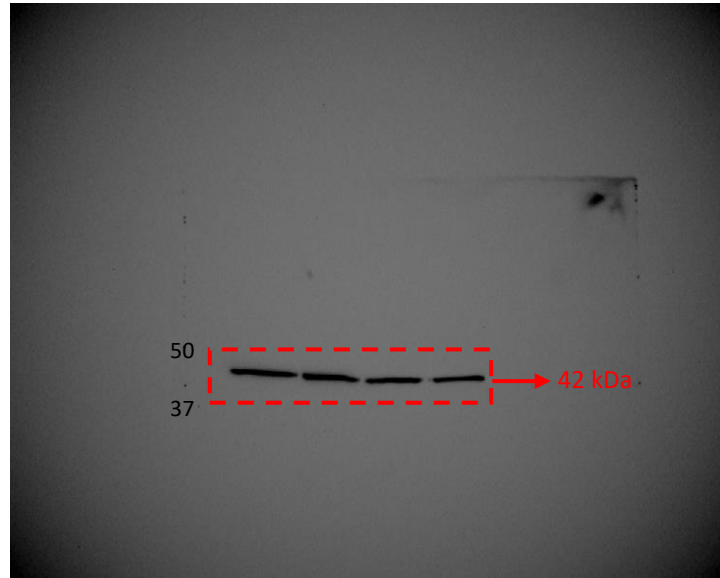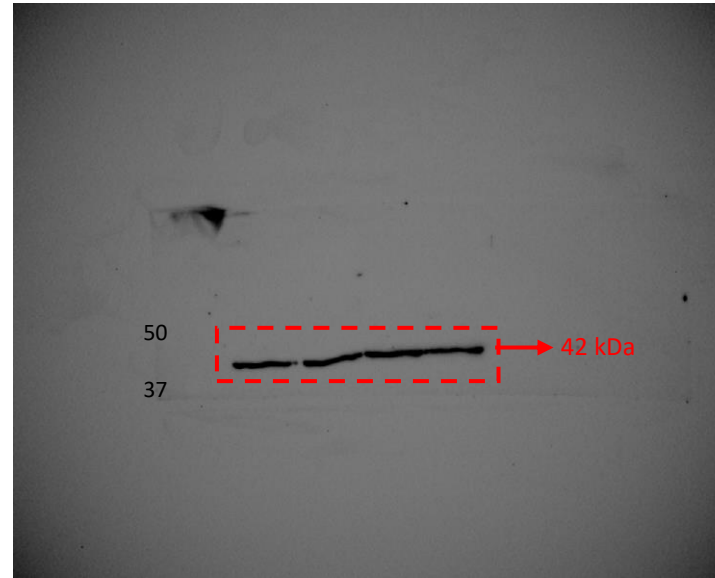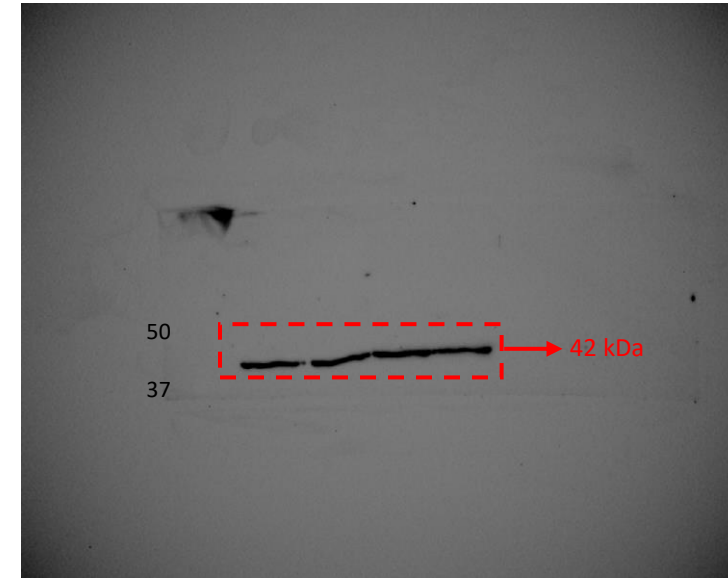

Bcl2  
26 kDa

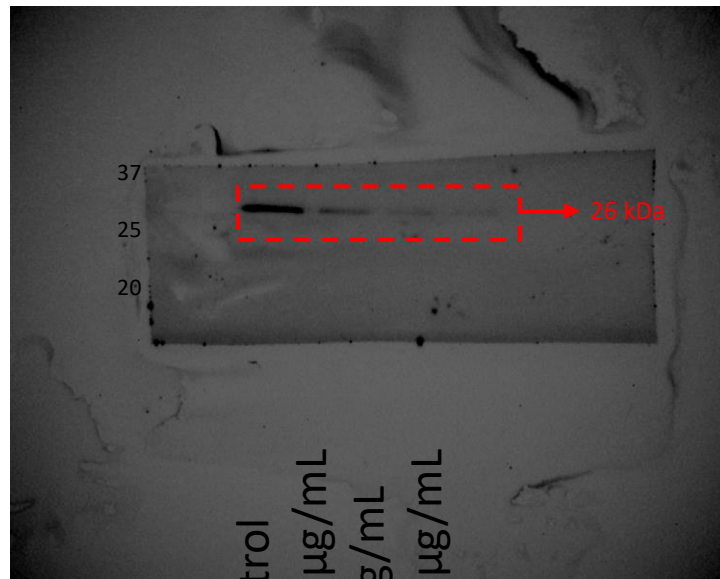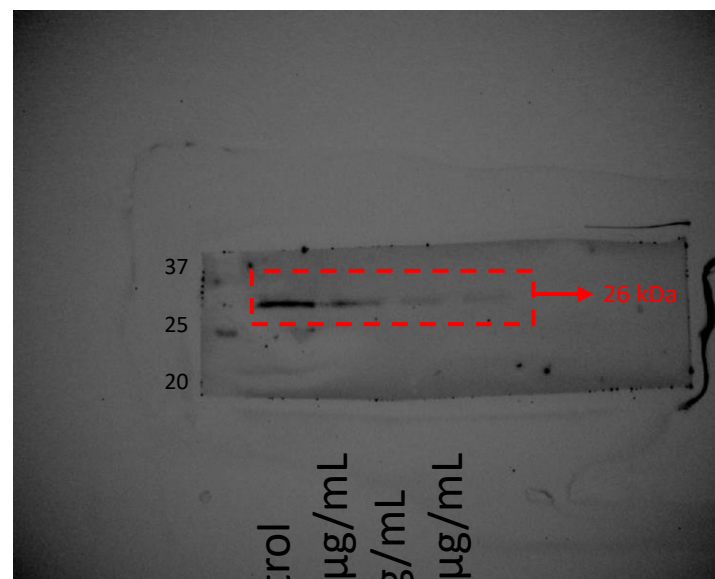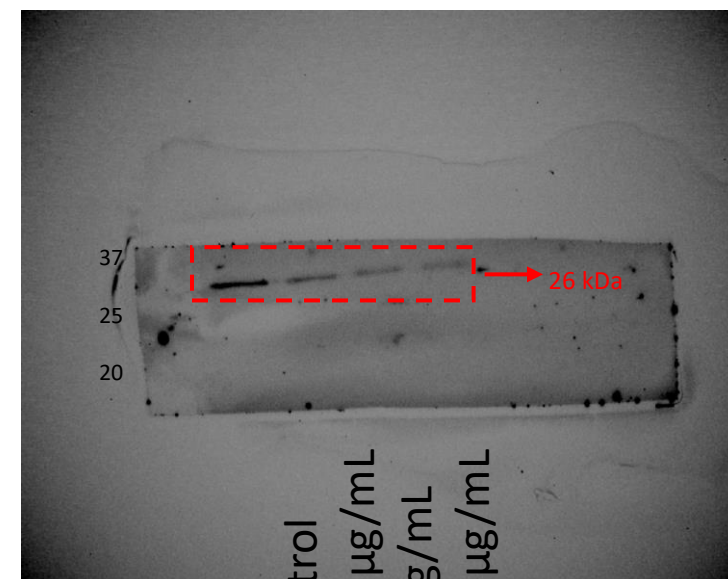

Control  
12.5  $\mu$ g/mL  
15  $\mu$ g/mL  
17.5  $\mu$ g/mL

Control  
12.5  $\mu$ g/mL  
15  $\mu$ g/mL  
17.5  $\mu$ g/mL

Control  
12.5  $\mu$ g/mL  
15  $\mu$ g/mL  
17.5  $\mu$ g/mL



**Panel 6 represents western blot analysis shown in Fig. 5 A**

Repeat 1

Repeat 2

Repeat 3

$\beta$ -actin  
42kDa

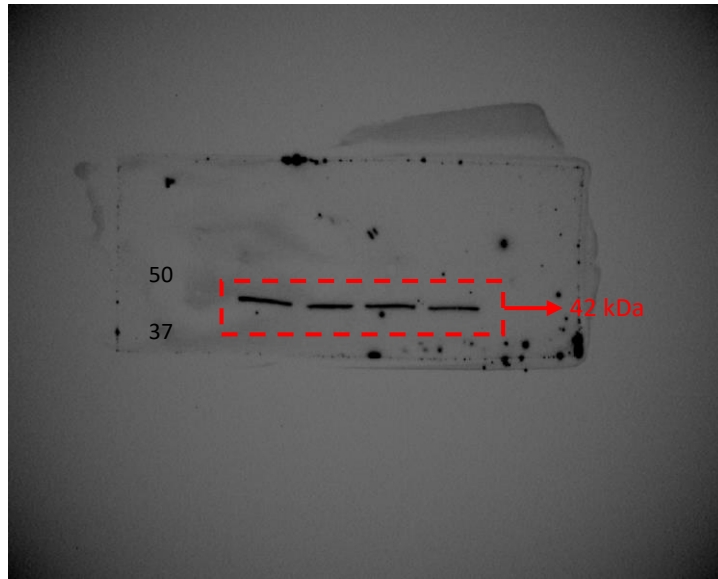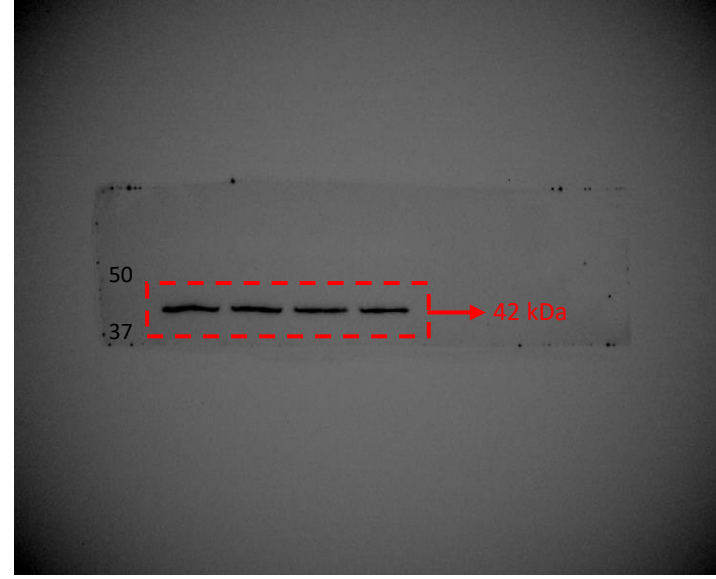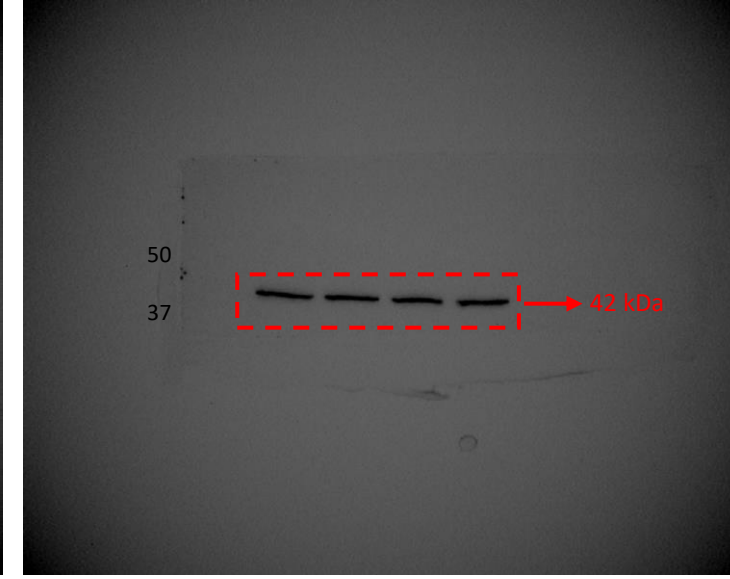

Bcl2  
26 kDa

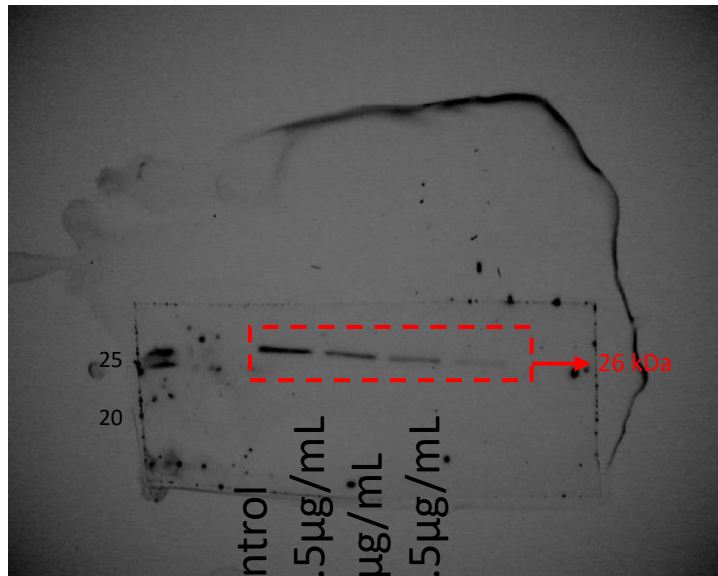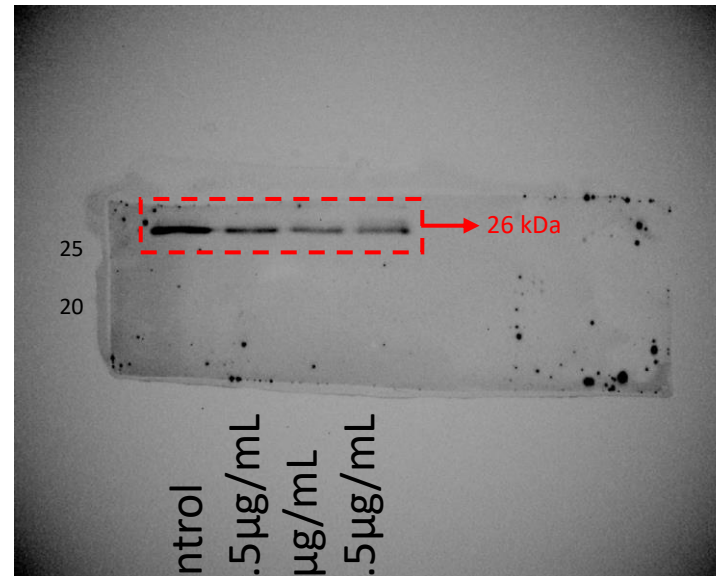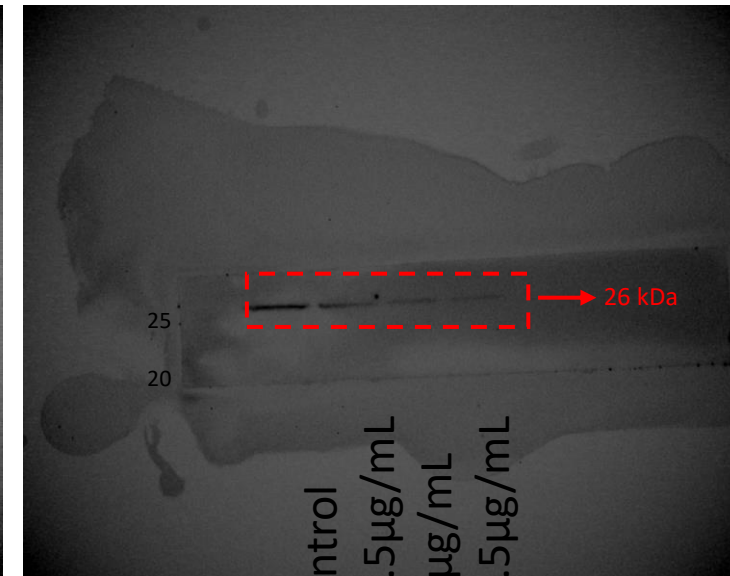

Control  
12.5  $\mu$ g/mL  
15  $\mu$ g/mL  
17.5  $\mu$ g/mL

Control  
12.5  $\mu$ g/mL  
15  $\mu$ g/mL  
17.5  $\mu$ g/mL

Control  
12.5  $\mu$ g/mL  
15  $\mu$ g/mL  
17.5  $\mu$ g/mL

**Panel 7 represents western blot analysis shown in Fig. 5 A**

Repeat 1

Repeat 2

Repeat 3

$\beta$ -actin  
42kDa

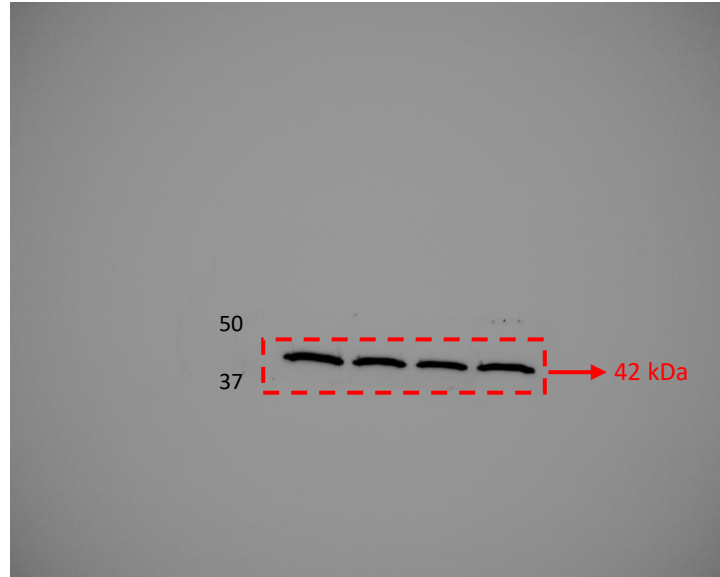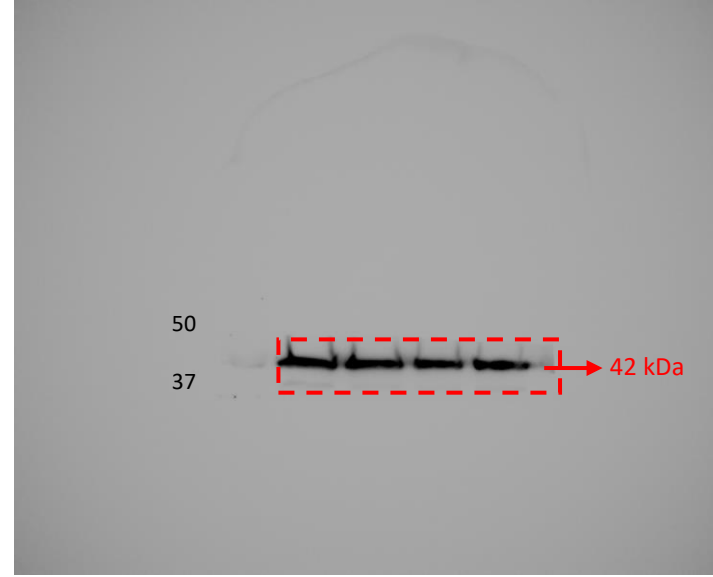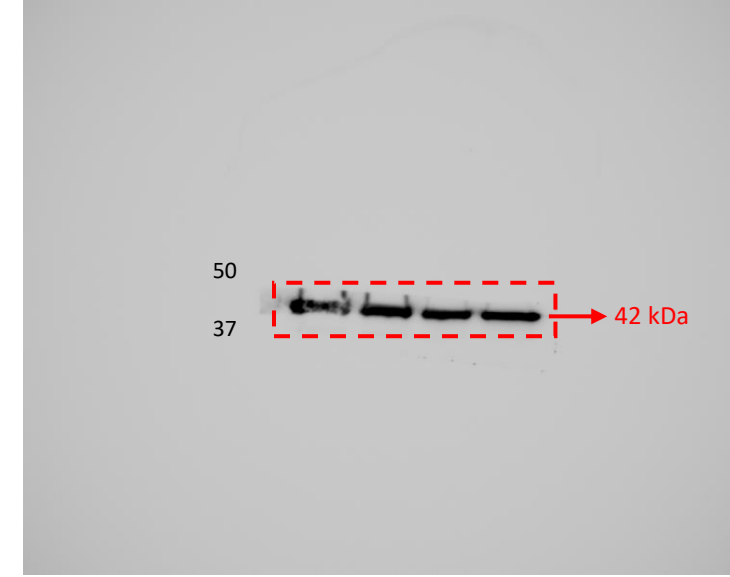

Cytochrome c  
14 kDa

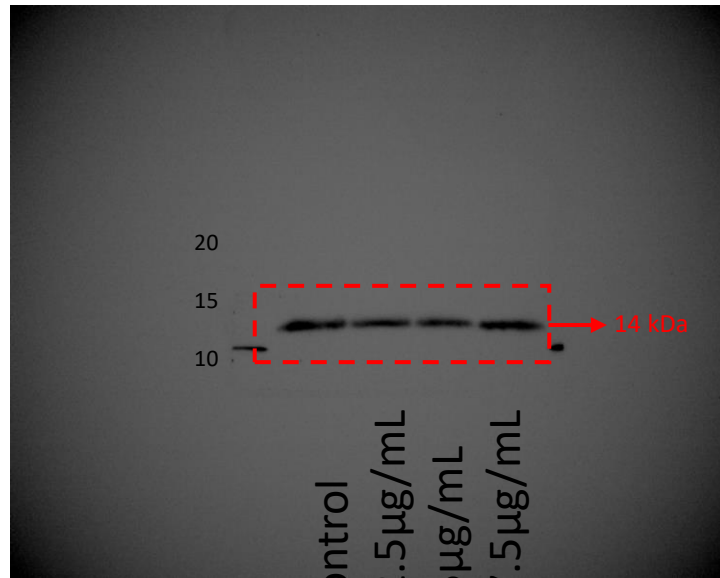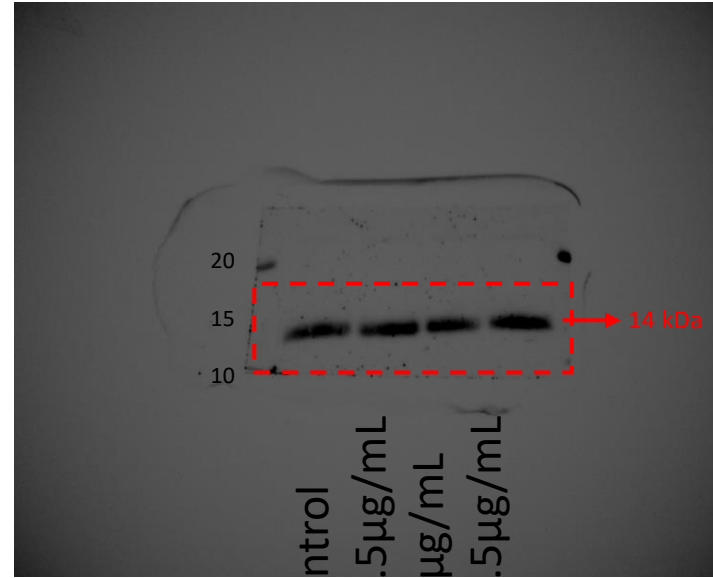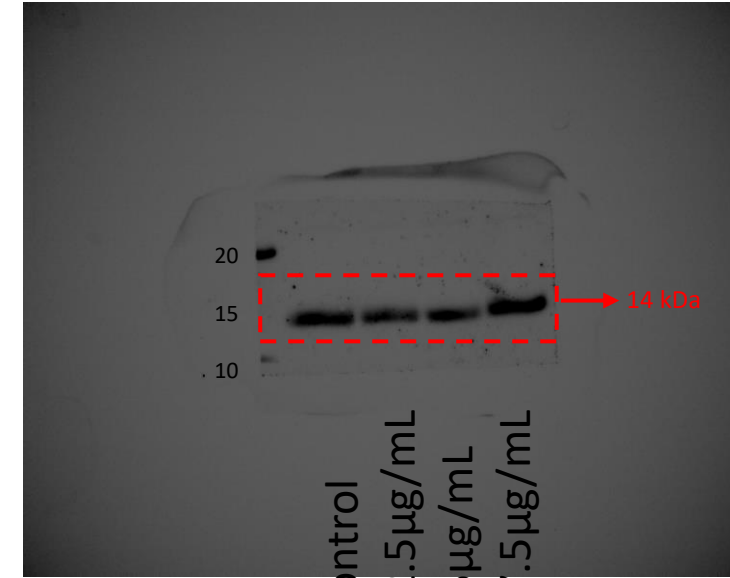

Control  
12.5  $\mu$ g/mL  
15  $\mu$ g/mL  
17.5  $\mu$ g/mL

Control  
12.5  $\mu$ g/mL  
15  $\mu$ g/mL  
17.5  $\mu$ g/mL

Control  
12.5  $\mu$ g/mL  
15  $\mu$ g/mL  
17.5  $\mu$ g/mL

**Panel 8 represents western blot analysis shown in Fig. 5 A**

Repeat 1

Repeat 2

Repeat 3

$\beta$ -actin  
42kDa

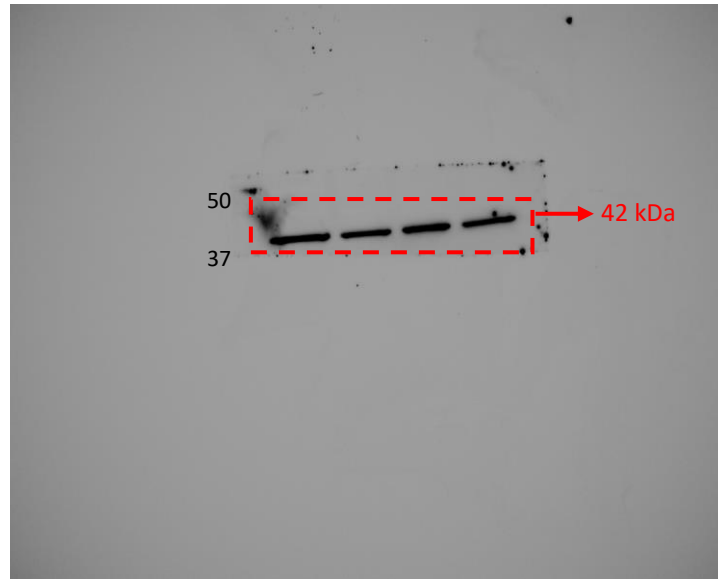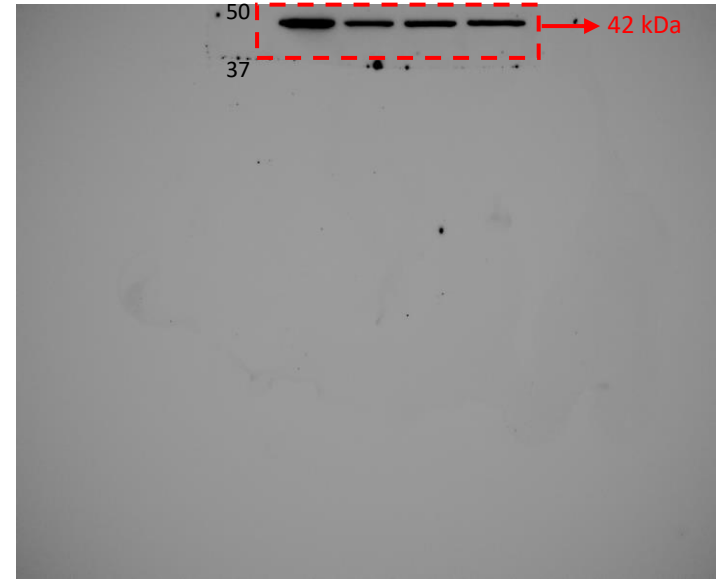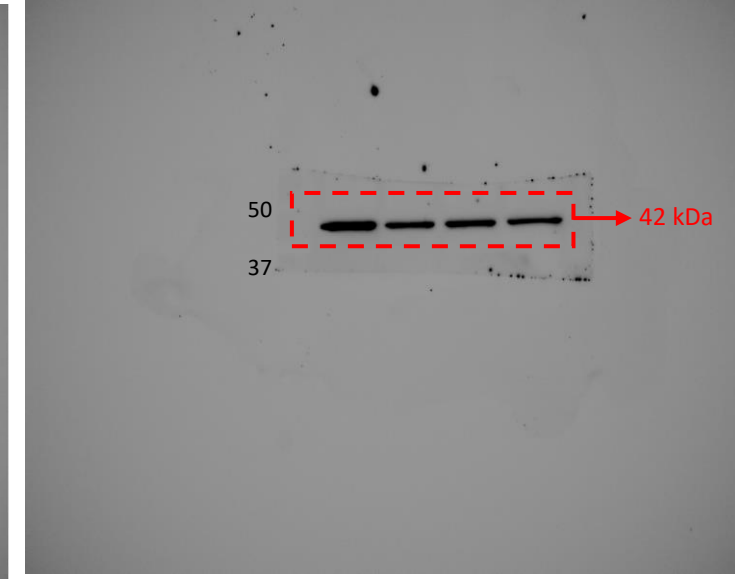

20  
15  
14 kDa

20  
15  
14 kDa

20  
15  
14 kDa

Control  
12.5  $\mu$ g/mL  
15  $\mu$ g/mL  
17.5  $\mu$ g/mL

Control  
12.5  $\mu$ g/mL  
15  $\mu$ g/mL  
17.5  $\mu$ g/mL

Control  
12.5  $\mu$ g/mL  
15  $\mu$ g/mL  
17.5  $\mu$ g/mL

Cytochrome c  
14 kDa

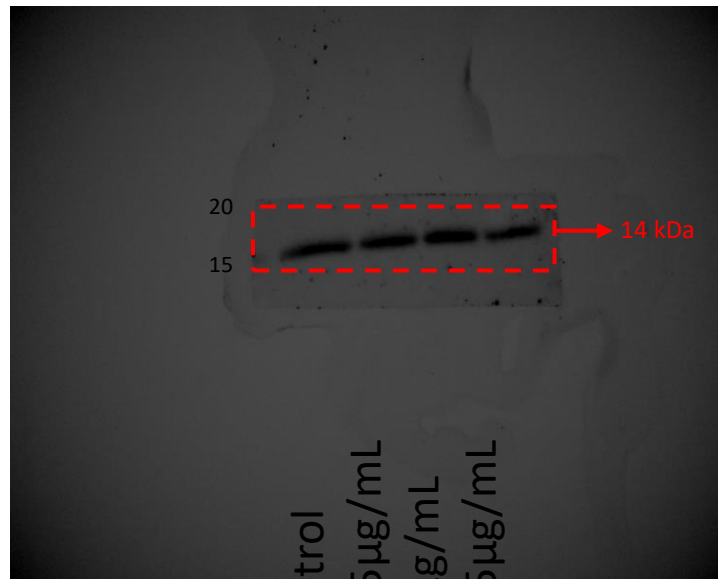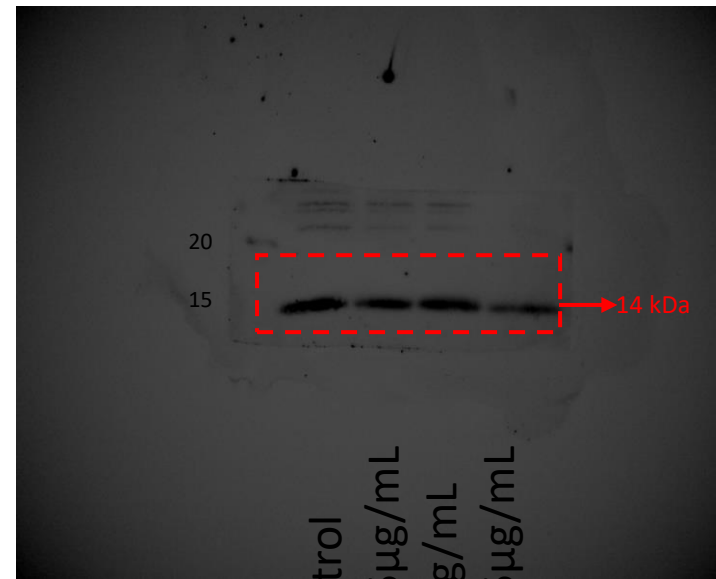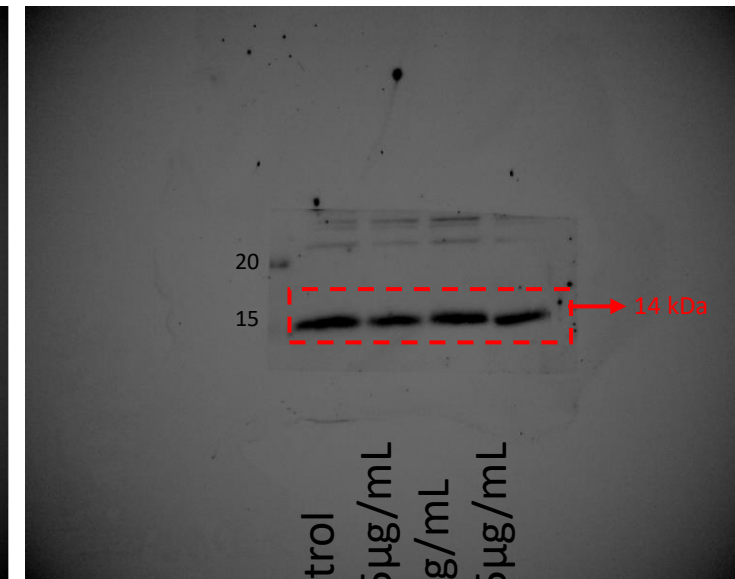

**Panel 9 represents western blot analysis shown in Fig. 5 A**

Repeat 1

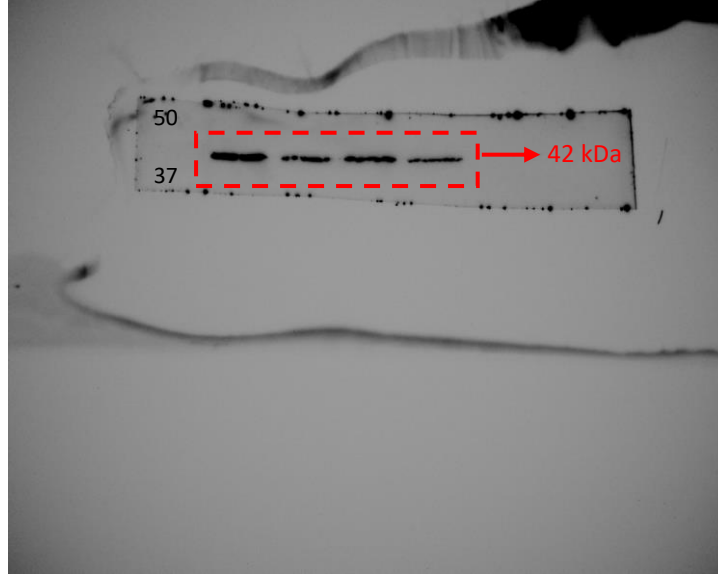

Repeat 2

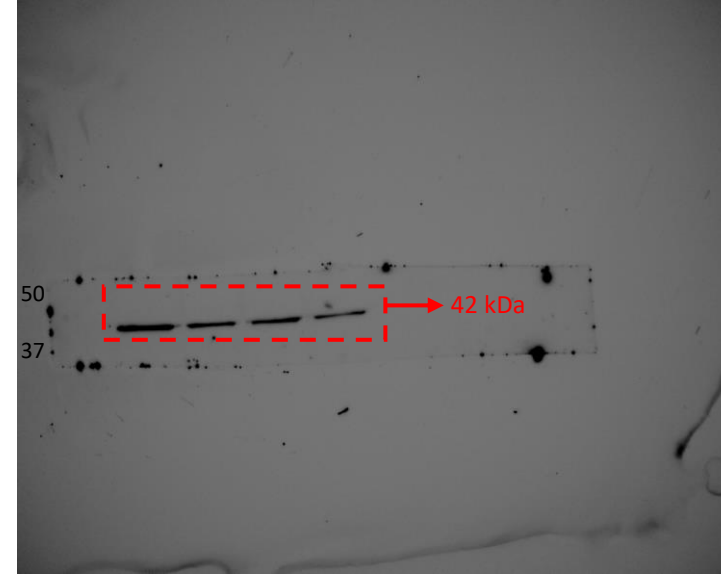

$\beta$ -actin  
42kDa

Cytochrome c  
14 kDa

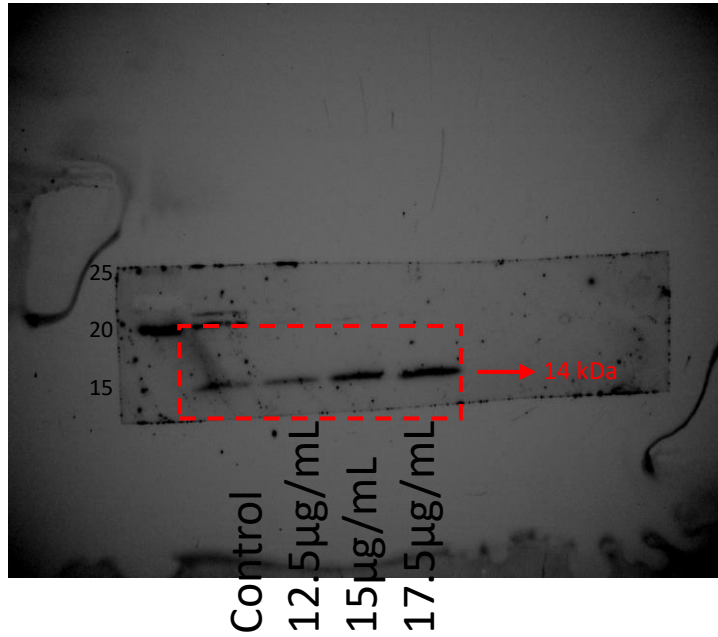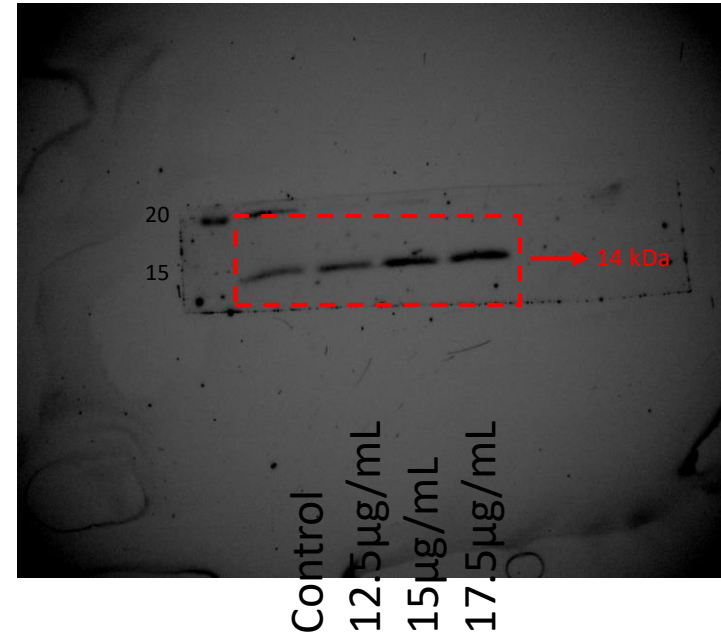

Control  
12.5  $\mu$ g/mL  
15  $\mu$ g/mL  
17.5  $\mu$ g/mL

Control  
12.5  $\mu$ g/mL  
15  $\mu$ g/mL  
17.5  $\mu$ g/mL

**Panel 10 represents western blot analysis shown in Fig. 5 A**

Repeat 1

Repeat 2

Repeat 3

$\beta$ -actin  
42kDa

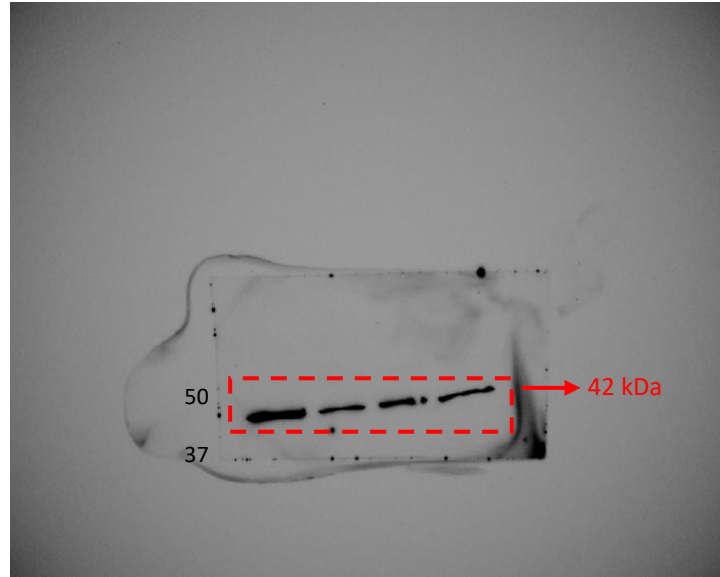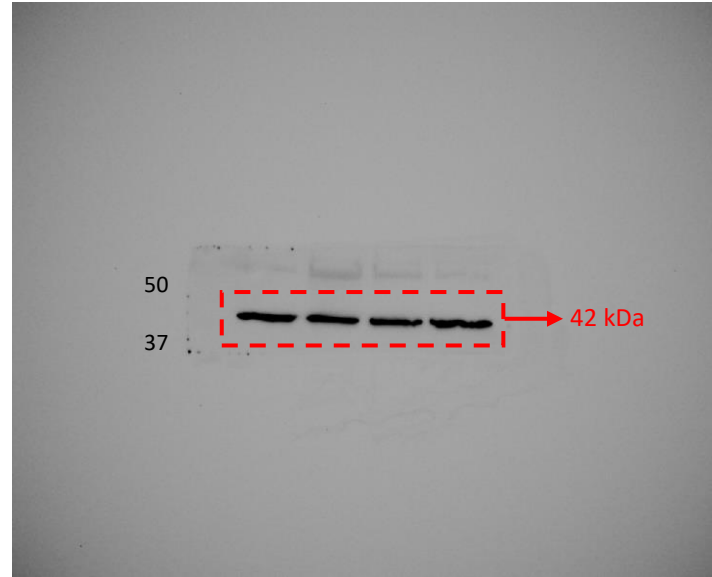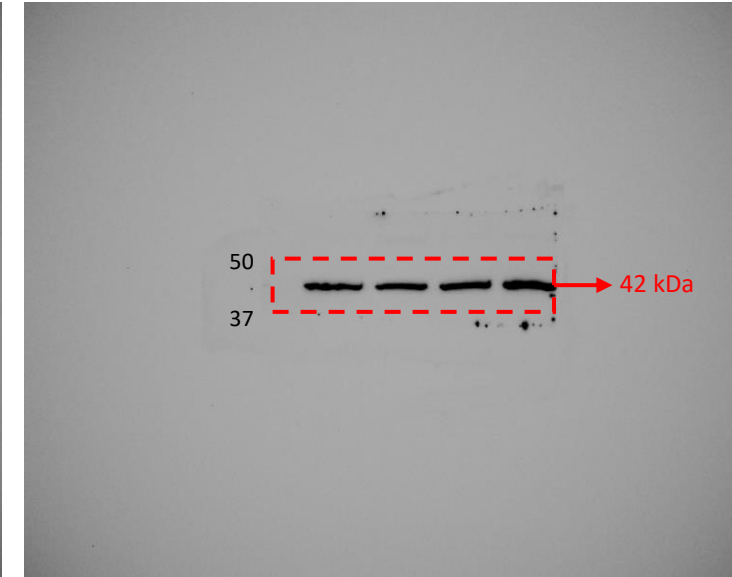

Cytochrome c  
14 kDa

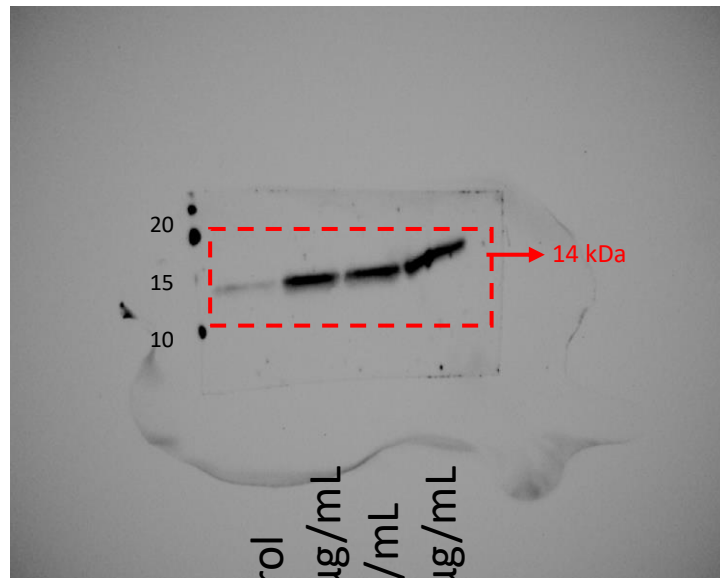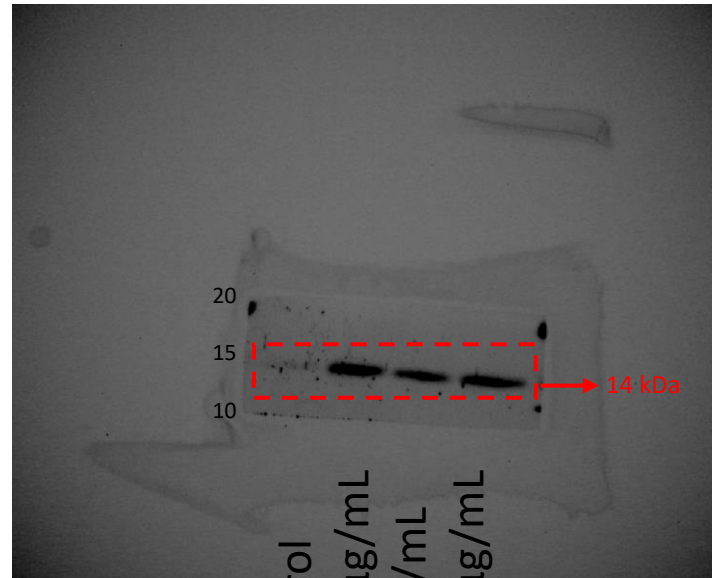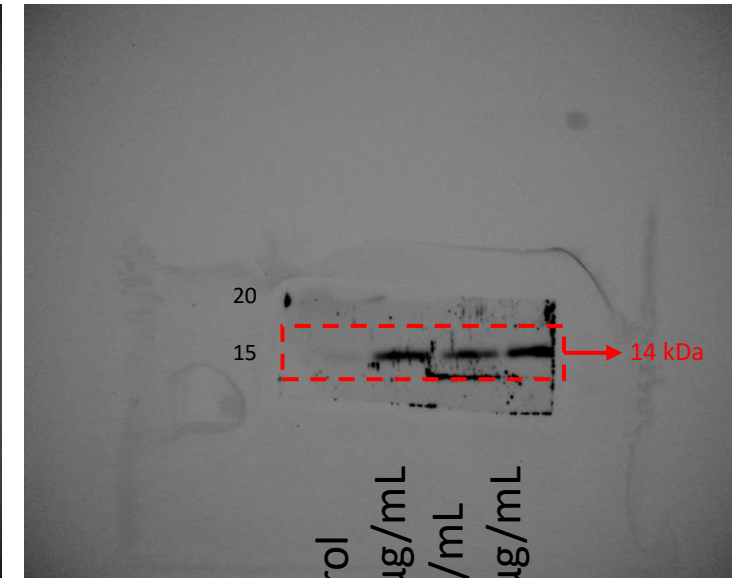

**Panel 11 represents western blot analysis shown in Fig. 5 A**

Repeat 1

Repeat 2

Repeat 3

$\beta$ -actin  
42kDa

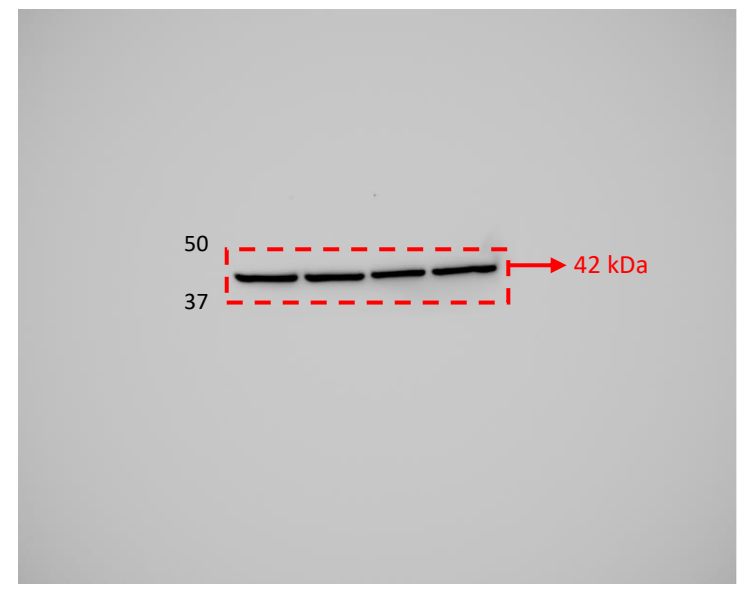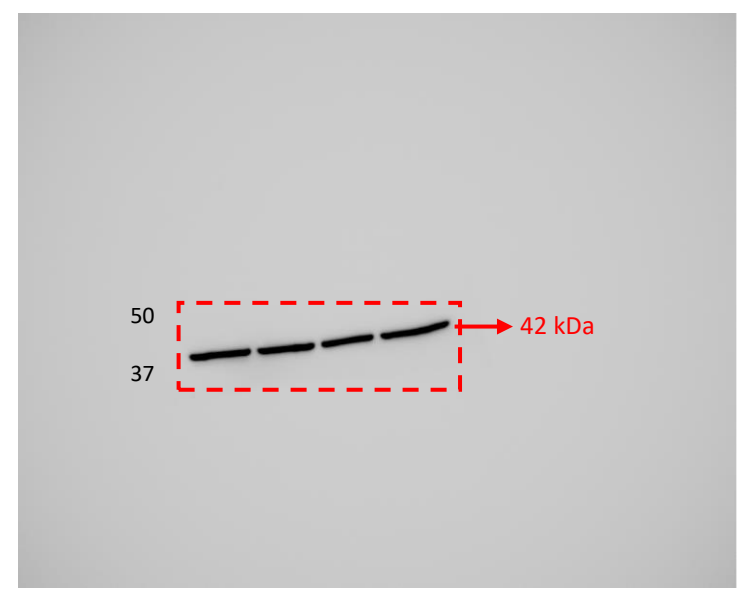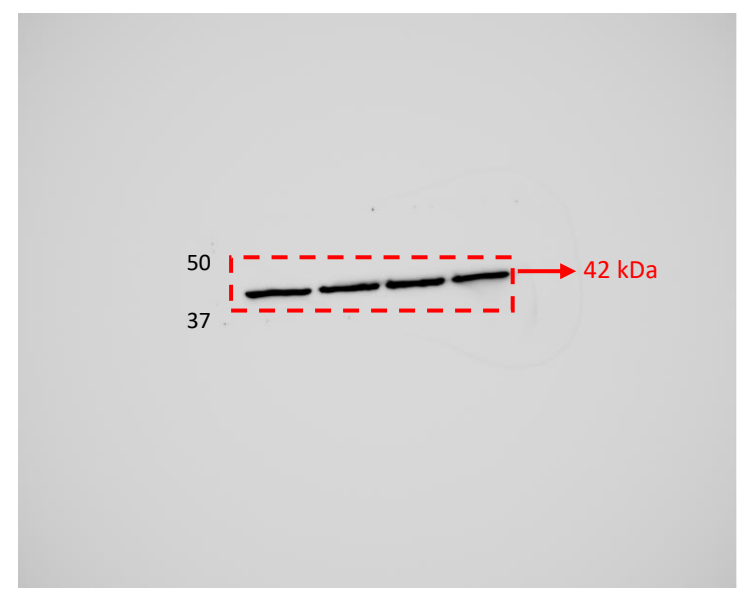

C-cas3  
17 kDa

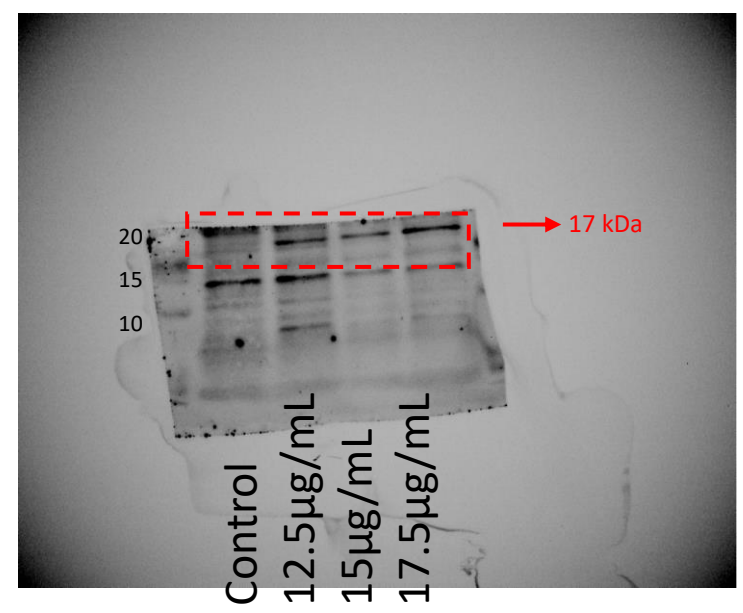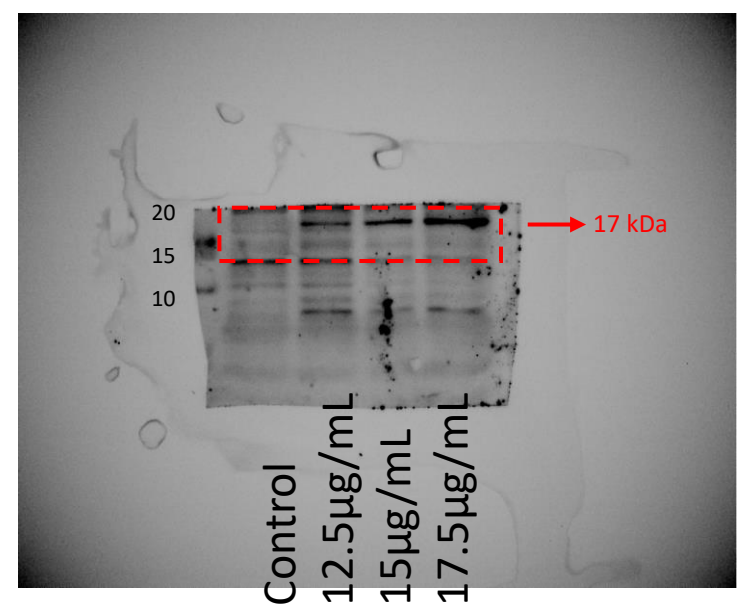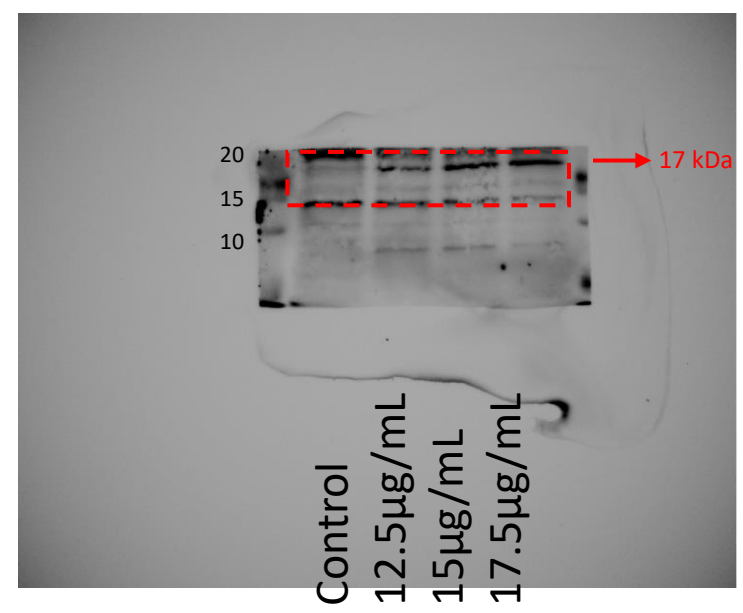

**Panel 12 represents western blot analysis shown in Fig. 5 A**

Repeat 1

Repeat 2

Repeat 3

$\beta$ -actin  
42kDa

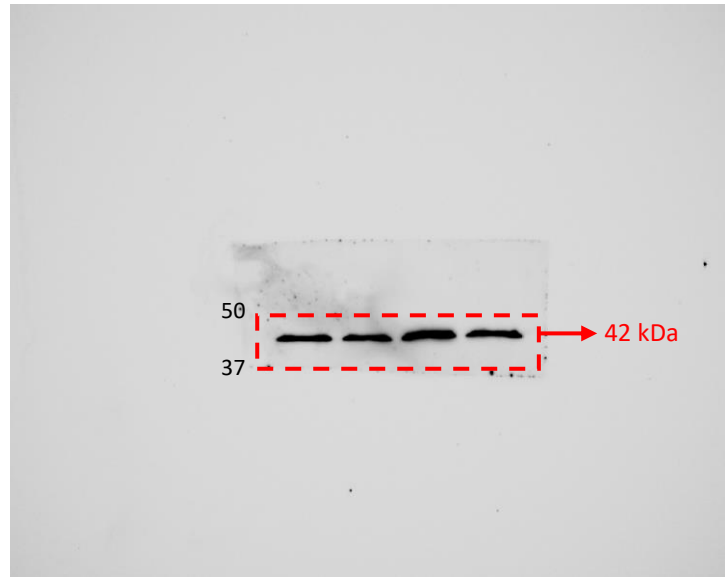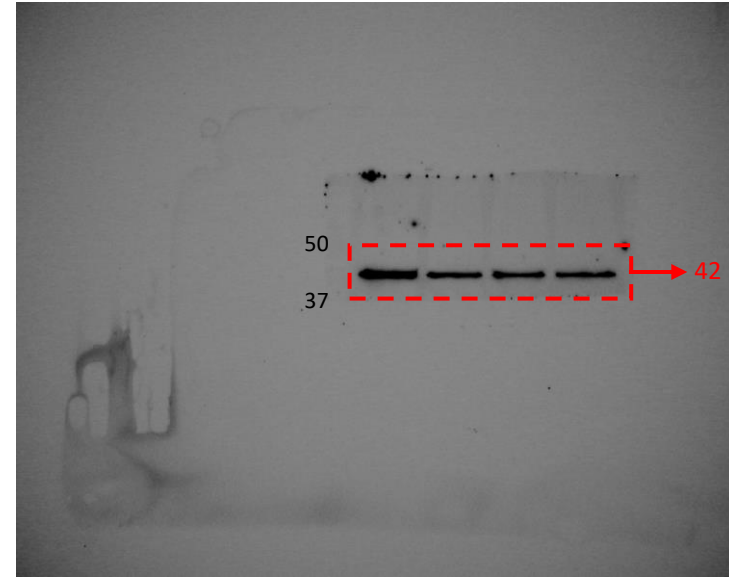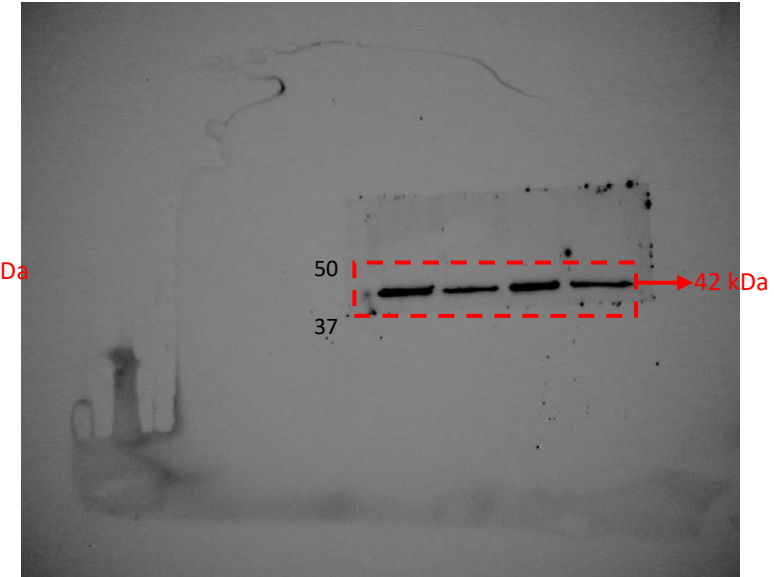

C-cas3  
17 kDa

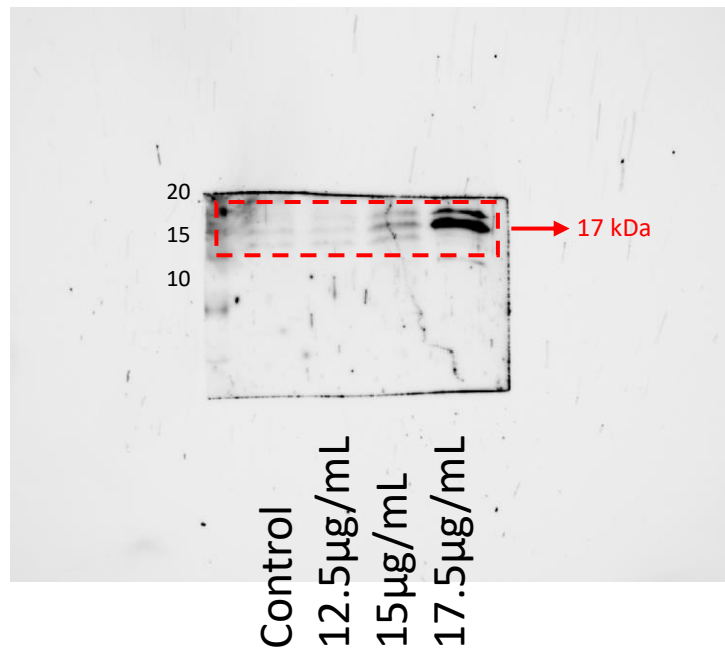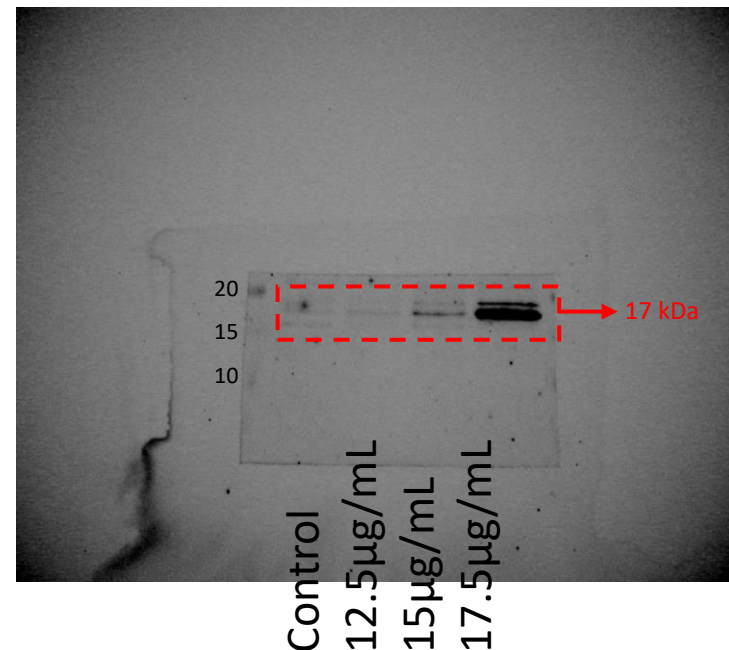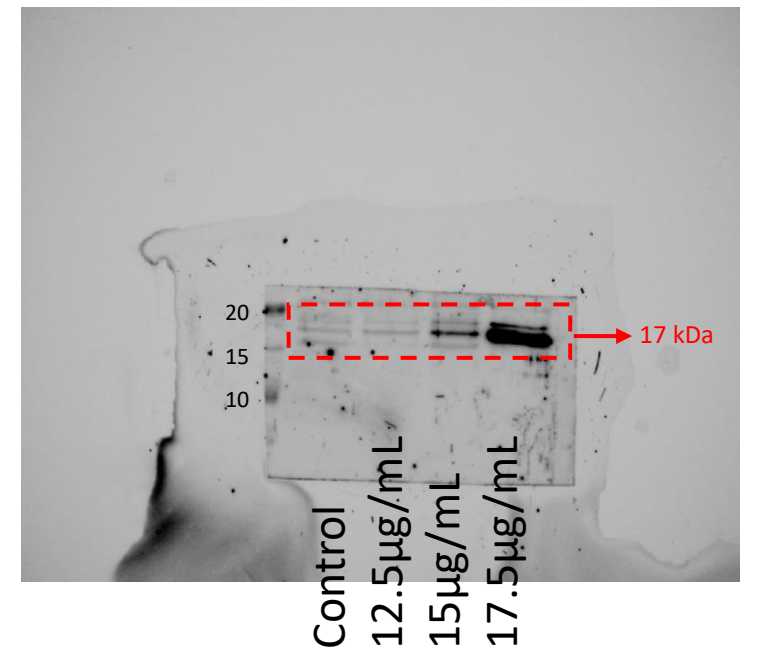

**Full-length blots of proteins reported in Figure 6**



**Panel 13 represents western blot analysis shown in Fig. 6 A**

Repeat 1

Repeat 2

Repeat 3

Beclin-1  
52 kDa

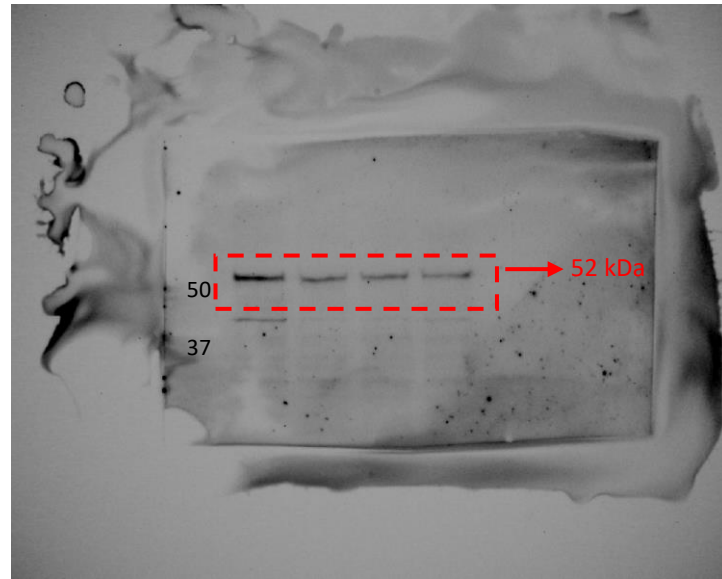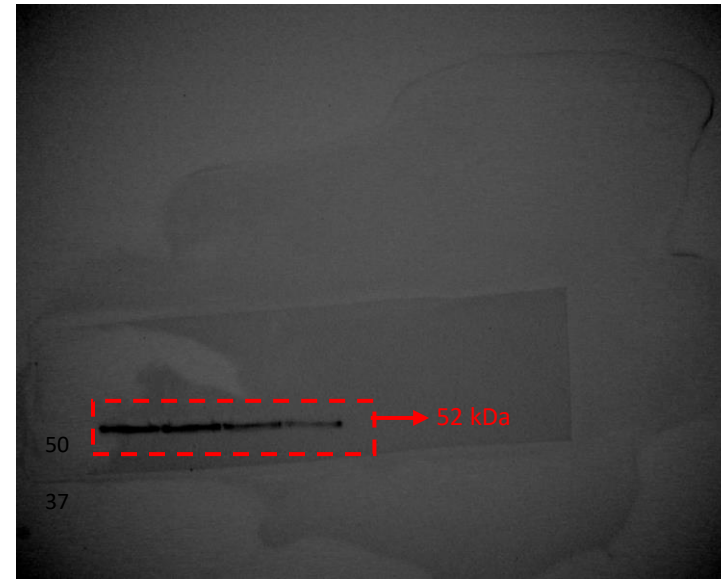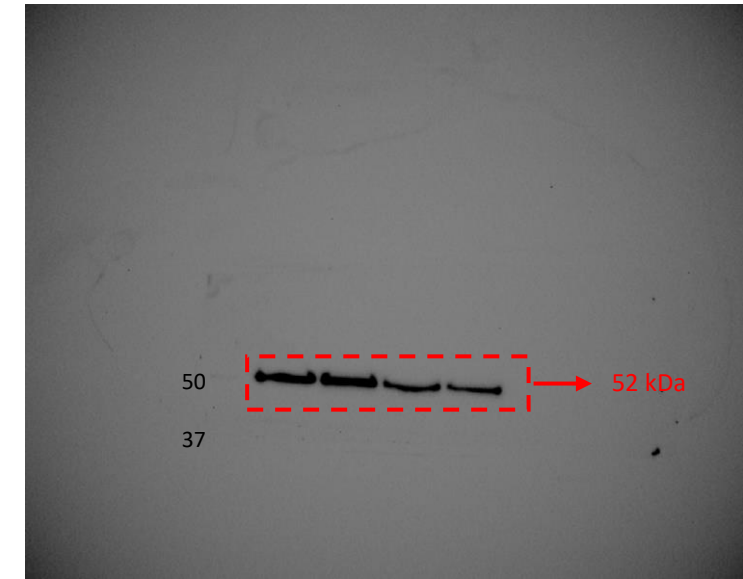

GAPDH  
36kDa

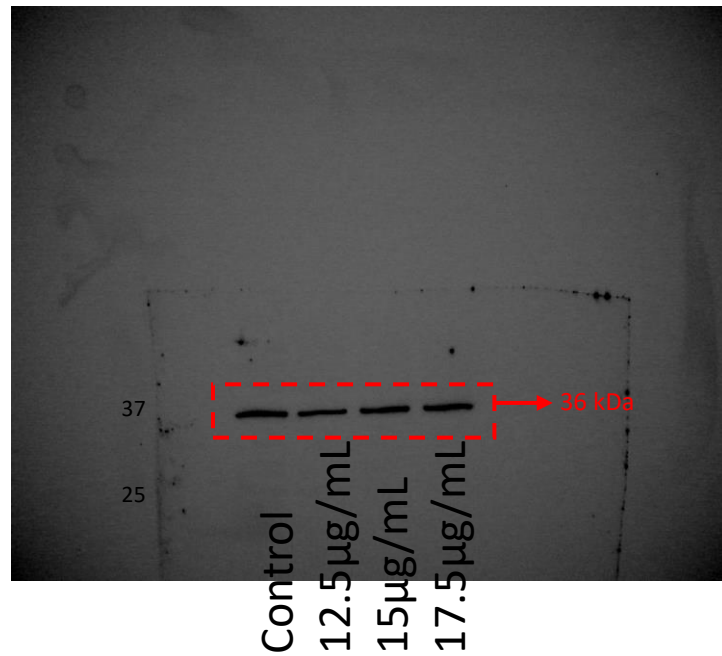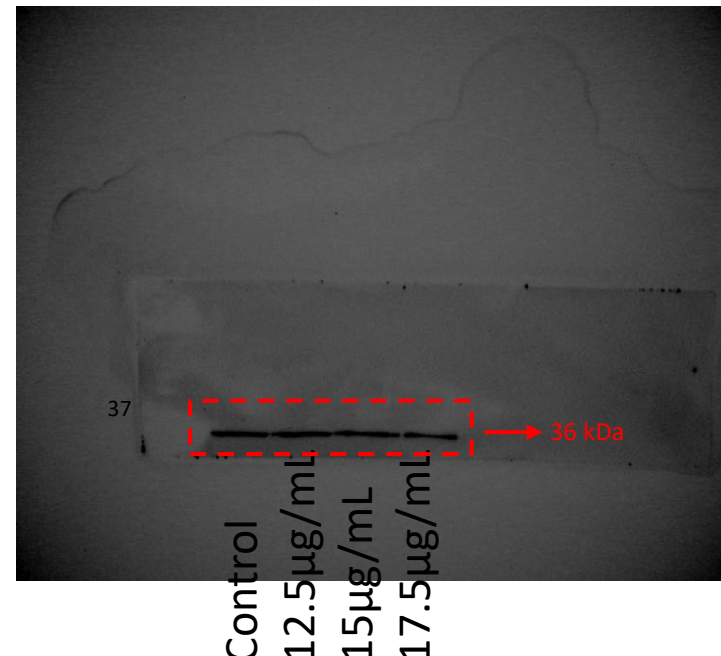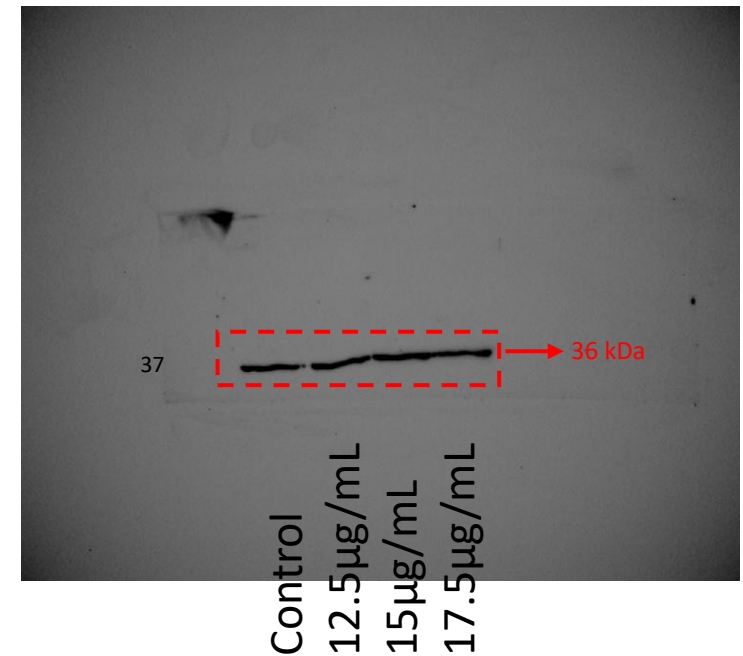

**Panel 14 represents western blot analysis shown in Fig. 6 A**

Repeat 1

Repeat 2

Repeat 3

Beclin-1  
52 kDa

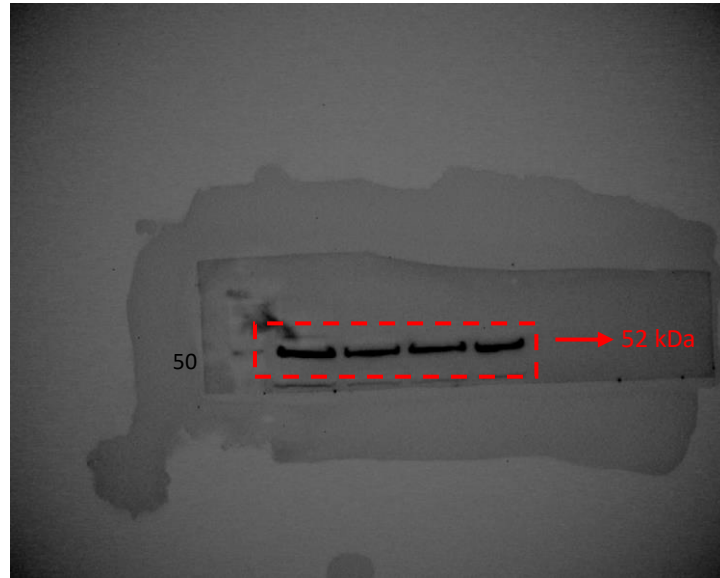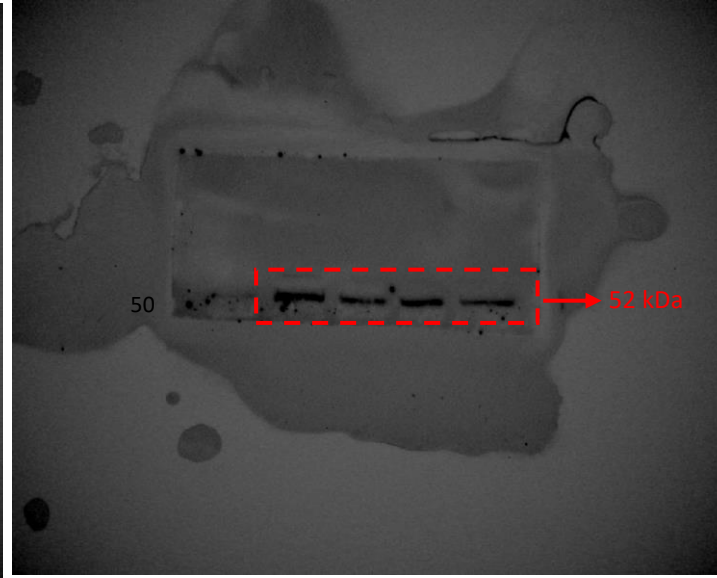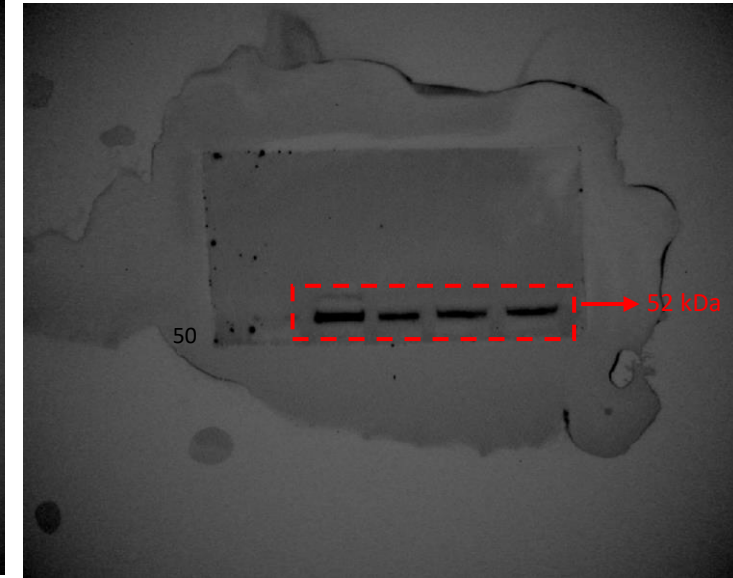

GAPDH  
36kDa

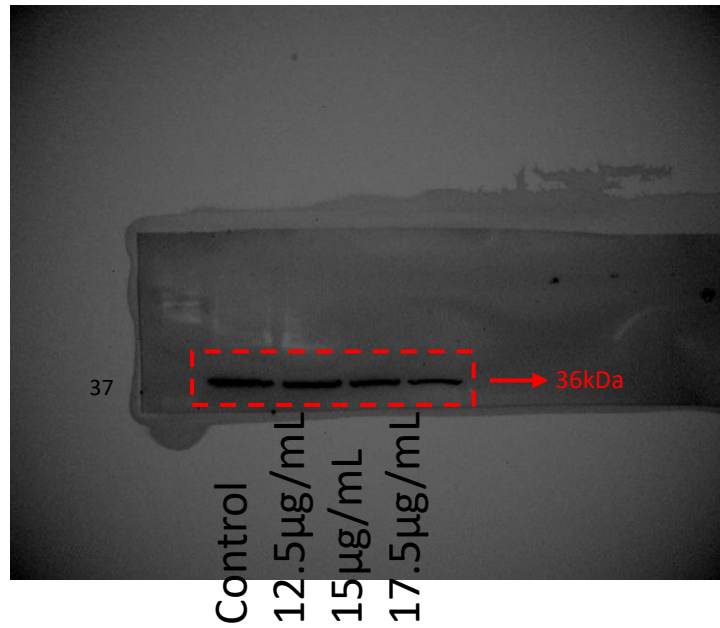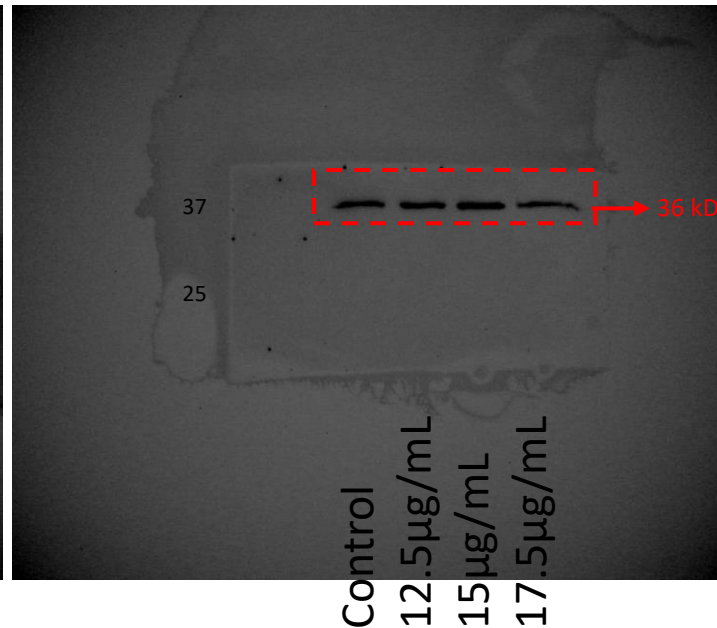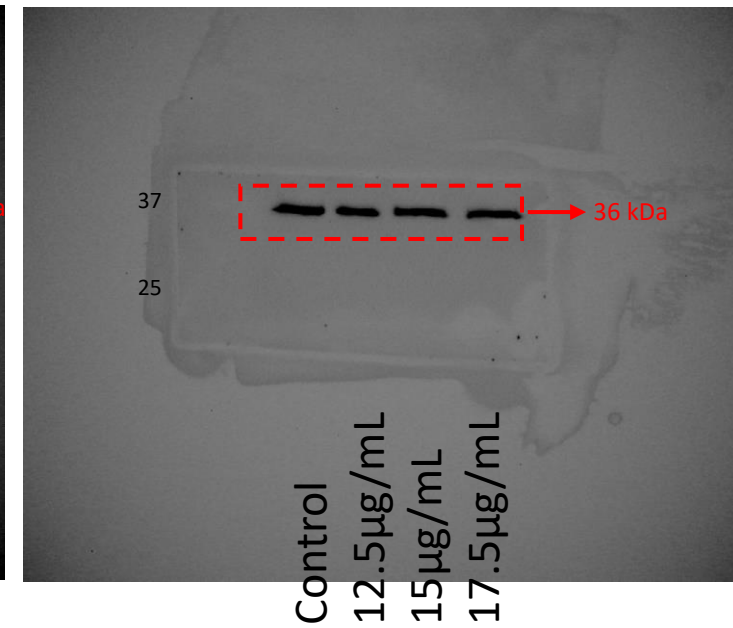

**Panel 15 represents western blot analysis shown in Fig. 6 A**

Repeat 1

Repeat 2

Repeat 3

Beclin-1  
52 kDa

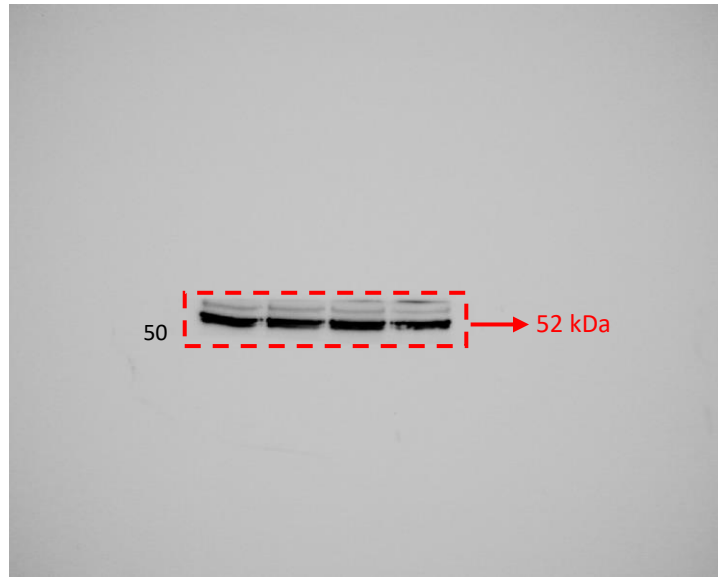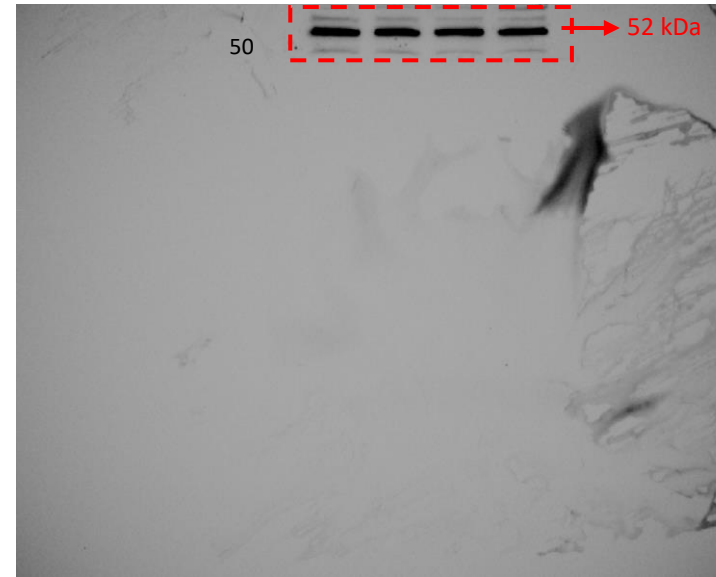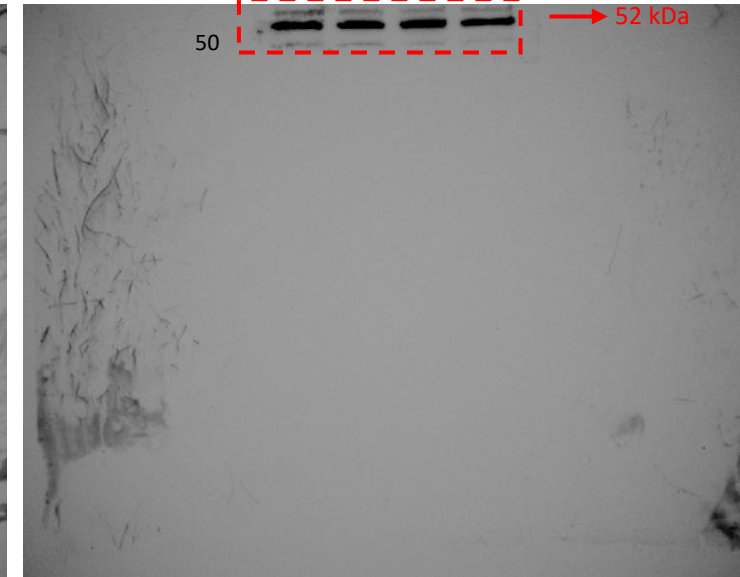

GAPDH  
36kDa

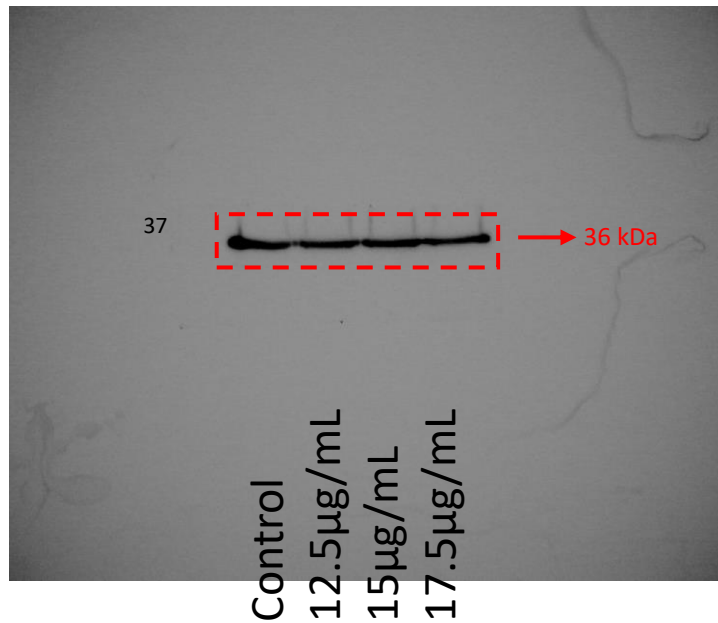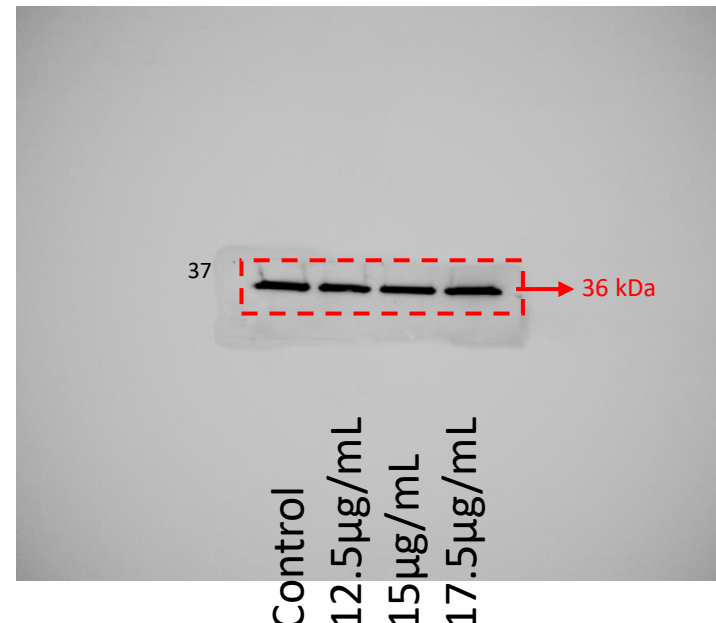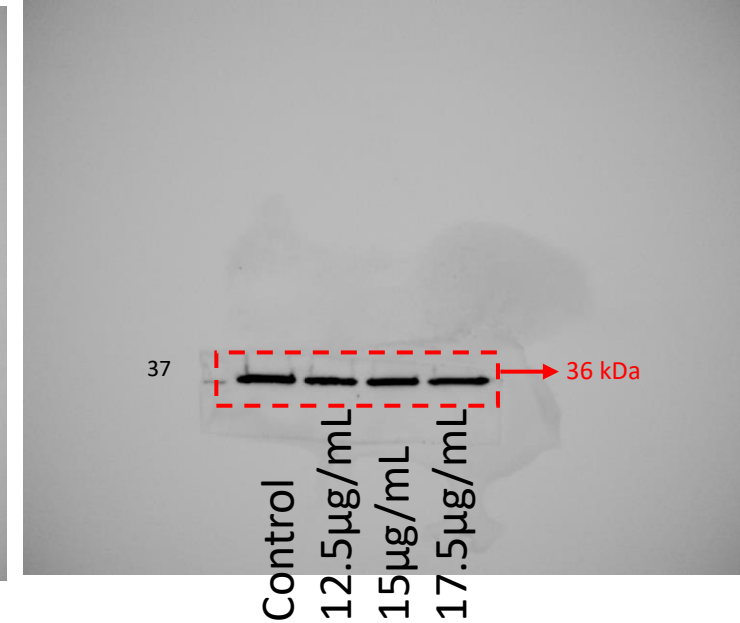

**Panel 16 represents western blot analysis shown in Fig. 6 A**

Repeat 1

Repeat 2

Repeat 3

Beclin-1  
52 kDa

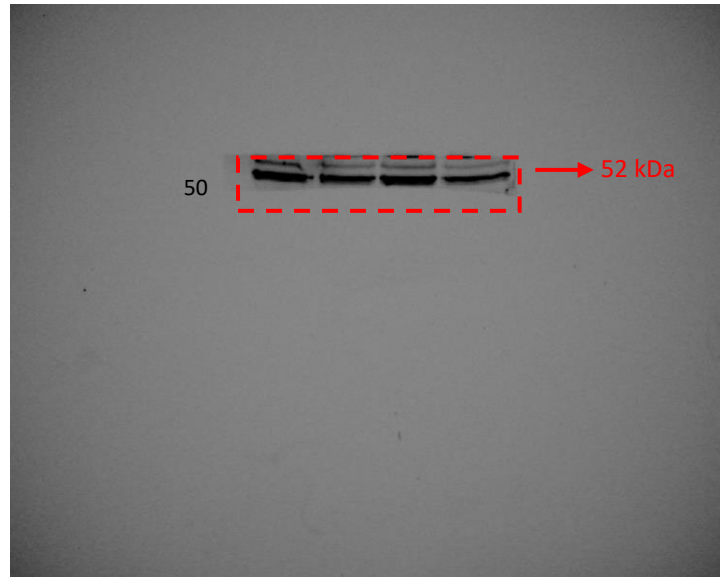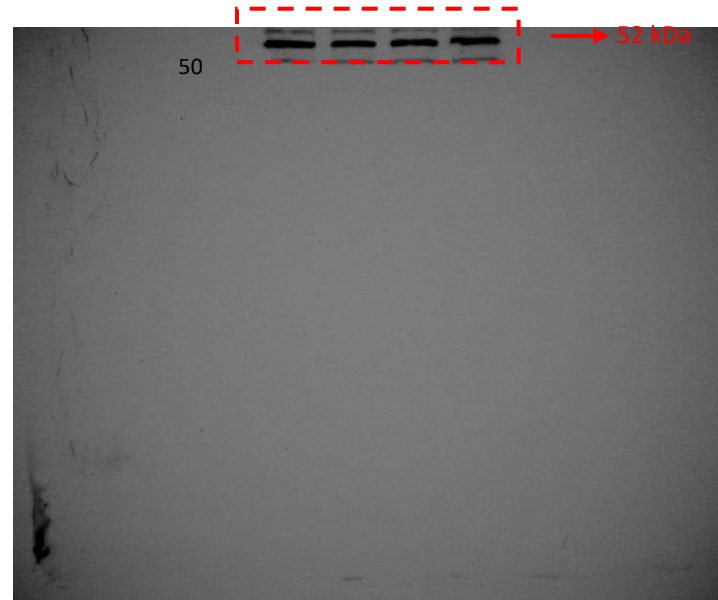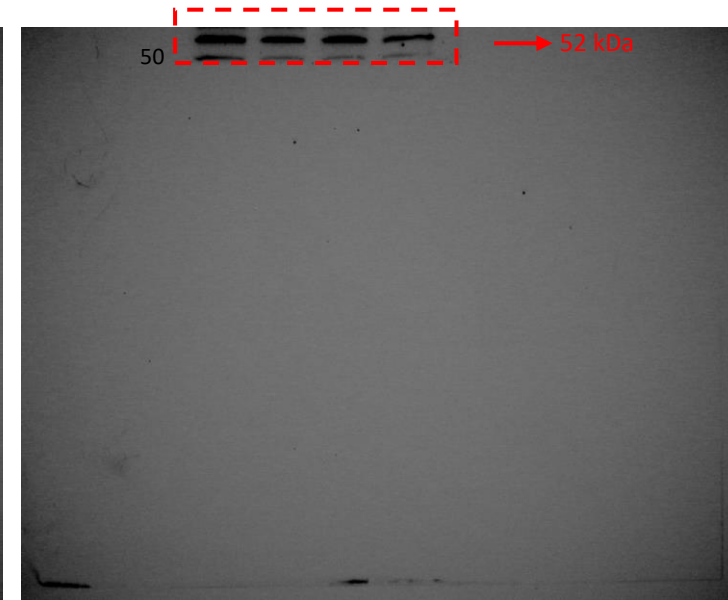

GAPDH  
36kDa

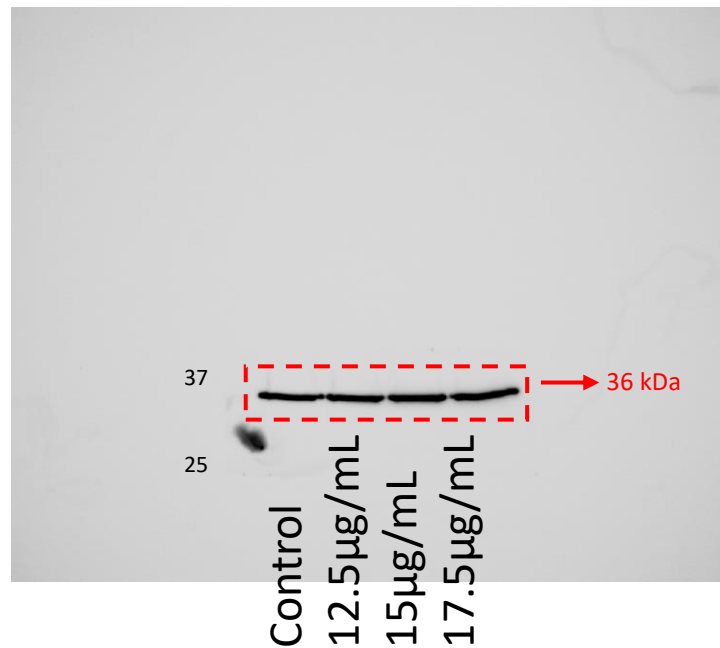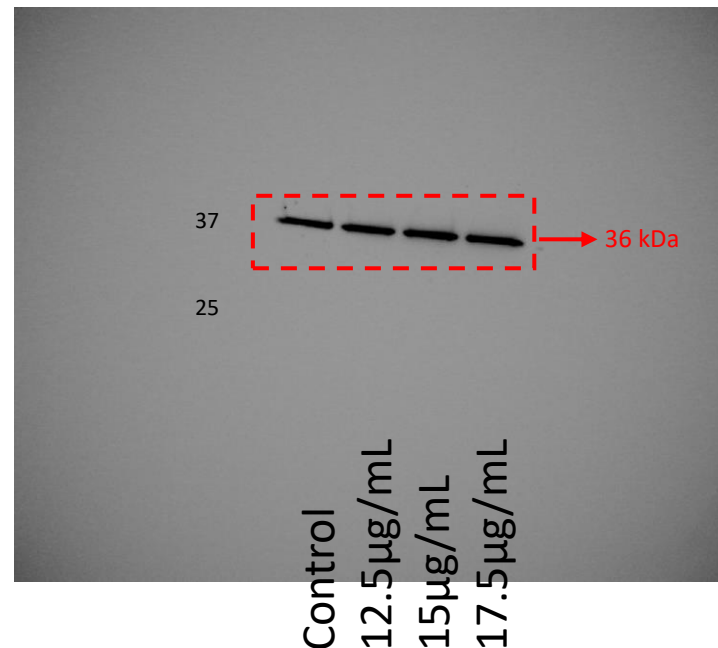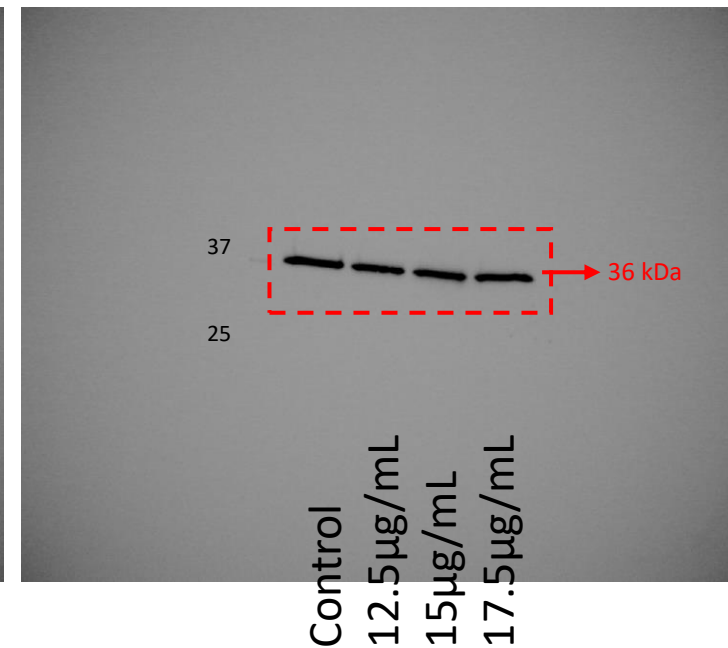

**Panel 17 represents western blot analysis shown in Fig. 6 A**

Repeat 1

Repeat 2

Repeat 3

$\beta$ -actin  
42kDa

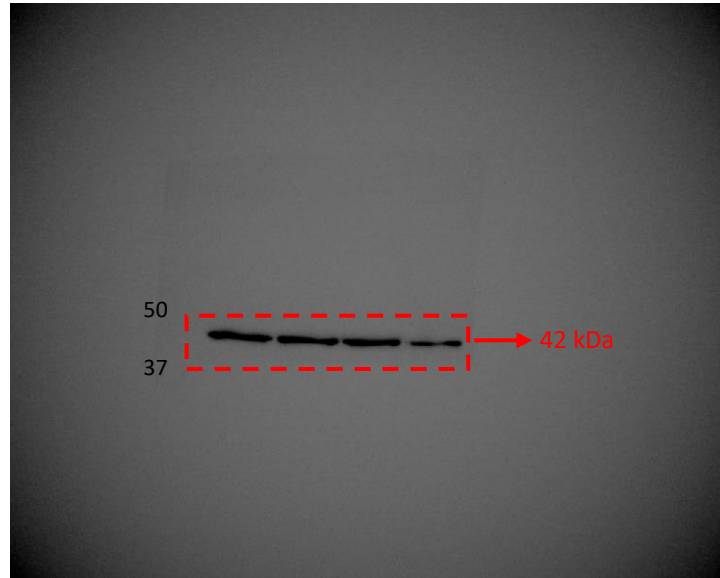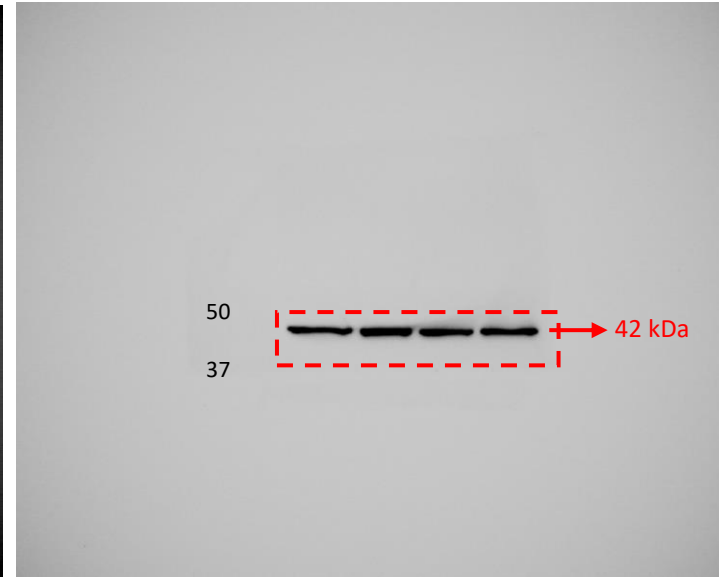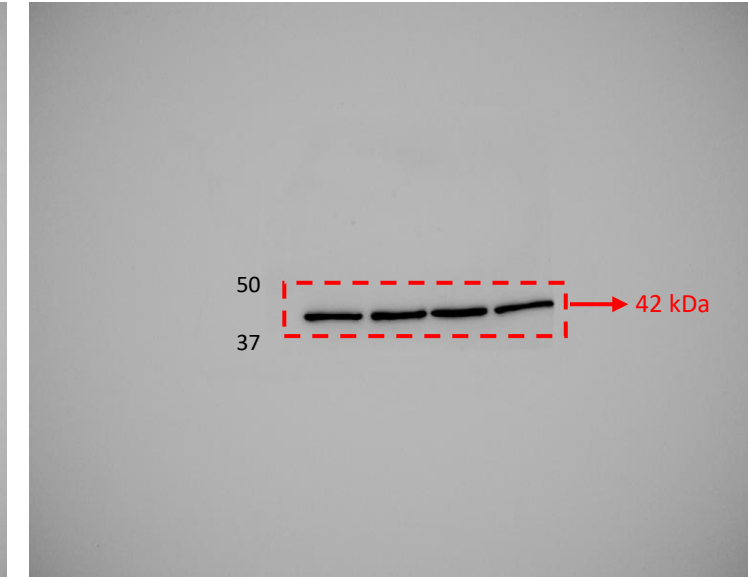

LC3B-II  
16kDa

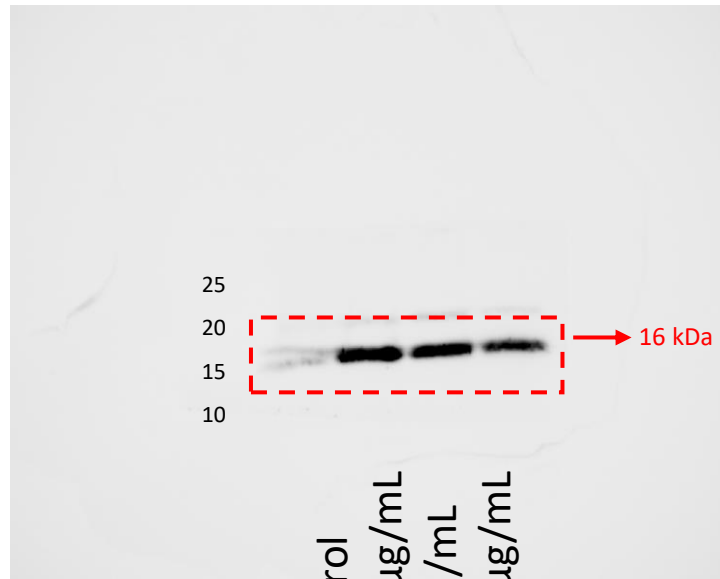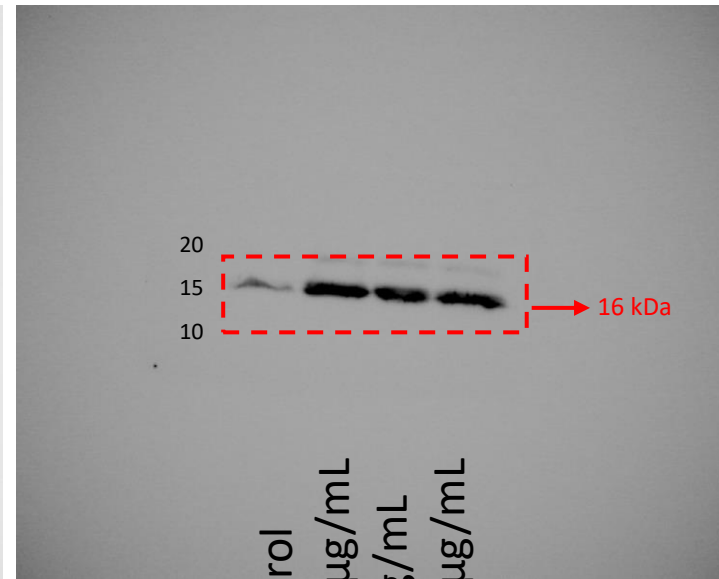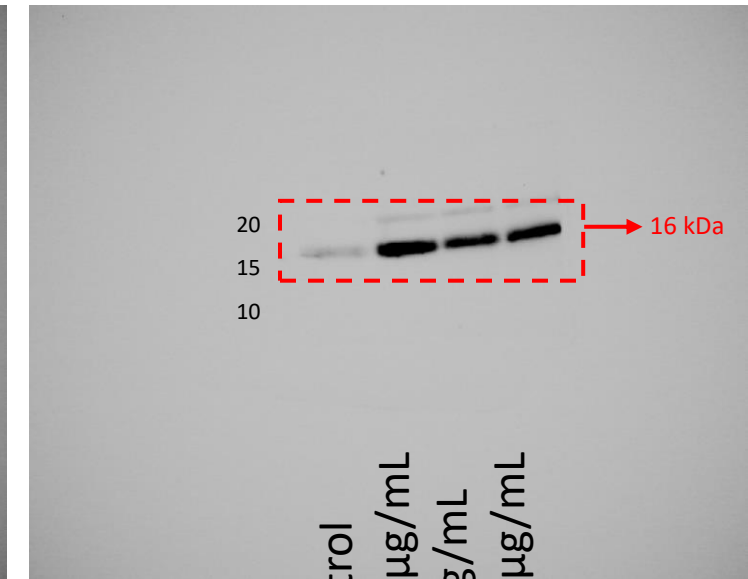

Control  
12.5  $\mu$ g/mL  
15  $\mu$ g/mL  
17.5  $\mu$ g/mL

Control  
12.5  $\mu$ g/mL  
15  $\mu$ g/mL  
17.5  $\mu$ g/mL

Control  
12.5  $\mu$ g/mL  
15  $\mu$ g/mL  
17.5  $\mu$ g/mL

**Panel 18 represents western blot analysis shown in Fig. 6 A**

Repeat 1

Repeat 2

Repeat 3

$\beta$ -actin  
42kDa

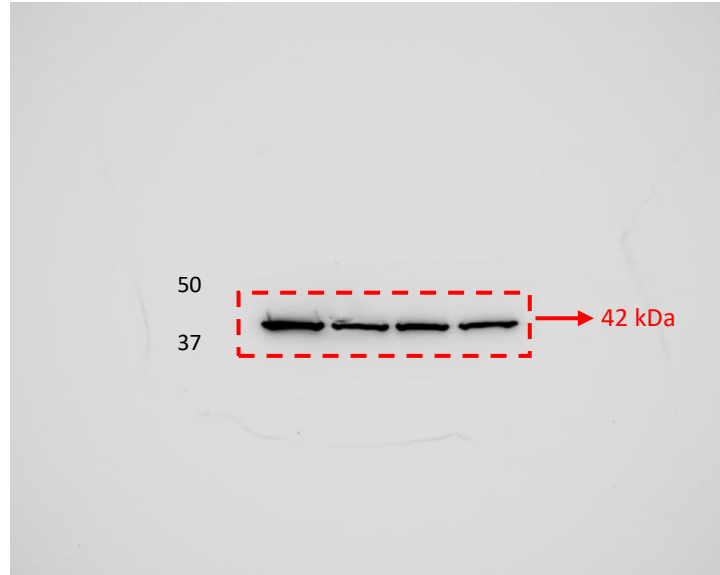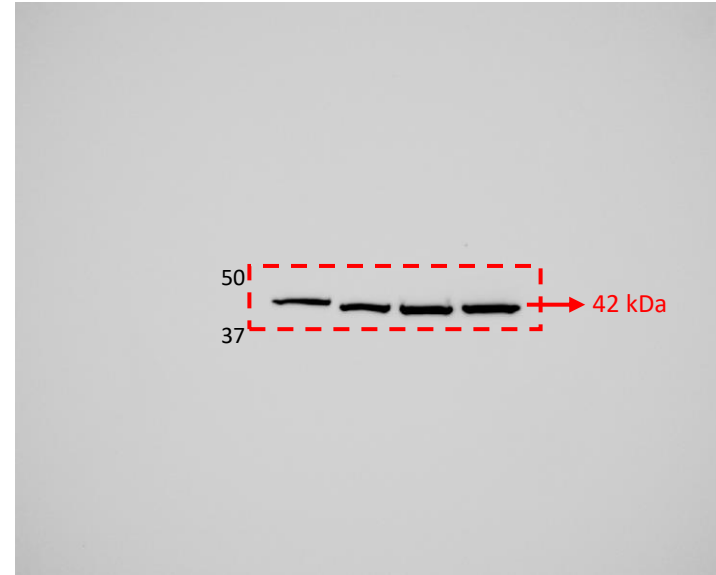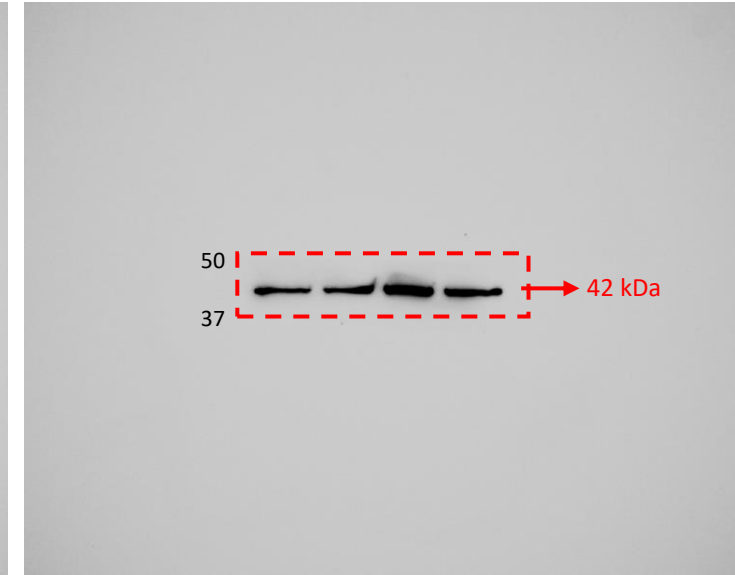

LC3B-II  
16kDa

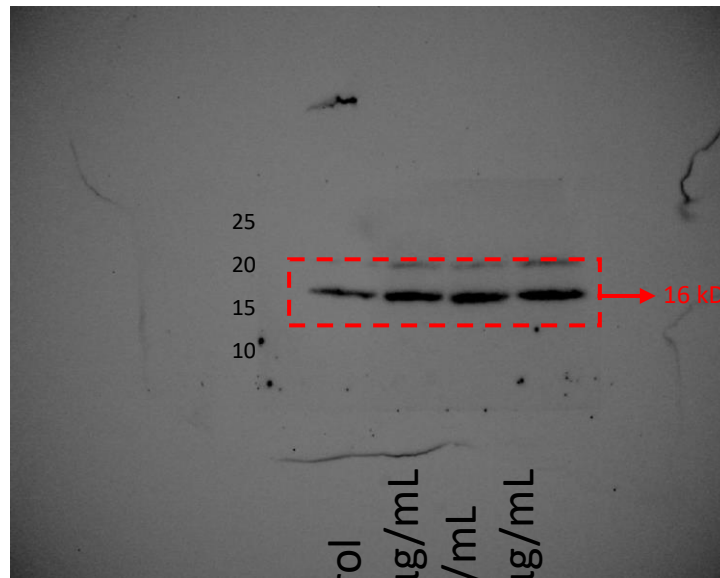

Control  
12.5 $\mu$ g/mL  
15 $\mu$ g/mL  
17.5 $\mu$ g/mL

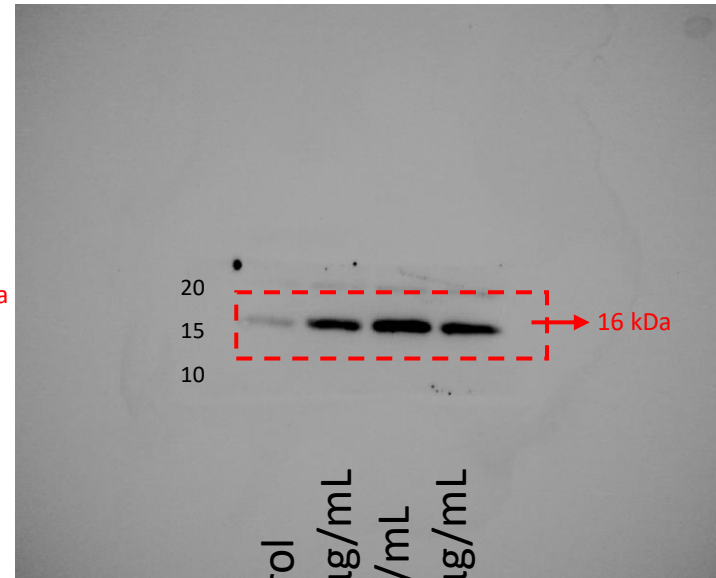

Control  
12.5 $\mu$ g/mL  
15 $\mu$ g/mL  
17.5 $\mu$ g/mL

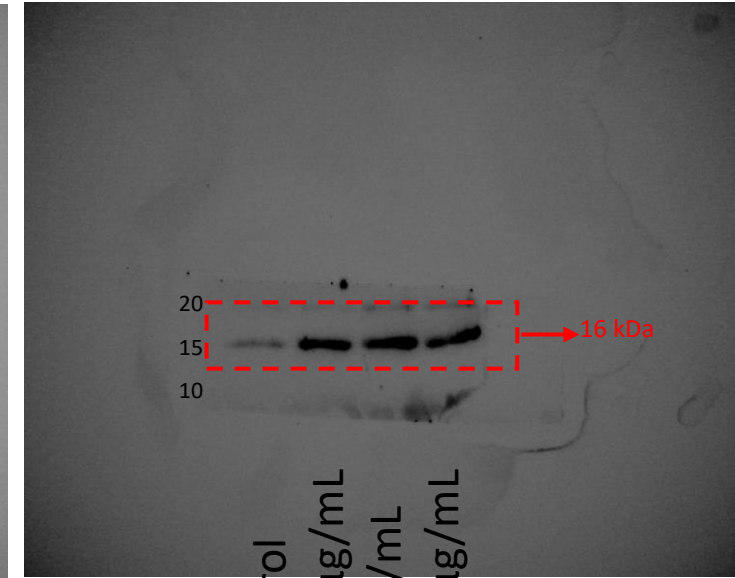

Control  
12.5 $\mu$ g/mL  
15 $\mu$ g/mL  
17.5 $\mu$ g/mL

**Panel 19 represents western blot analysis shown in Fig. 6 A**

Repeat 1

Repeat 2

Repeat 3

$\beta$ -actin  
42kDa

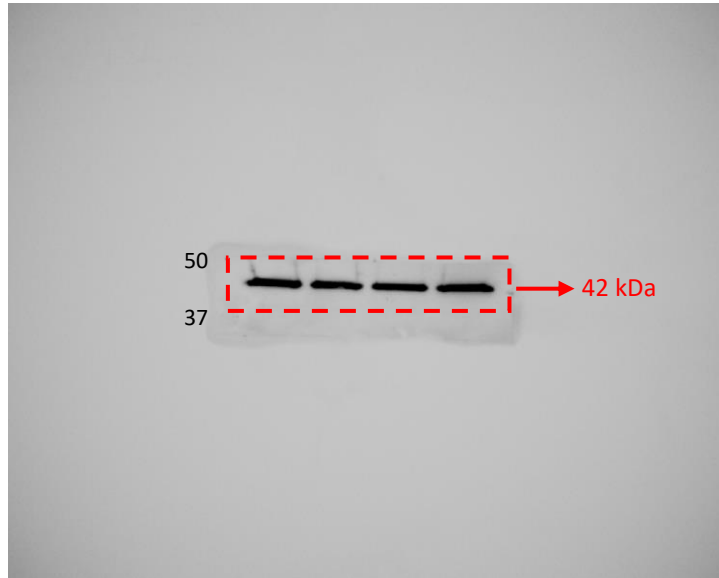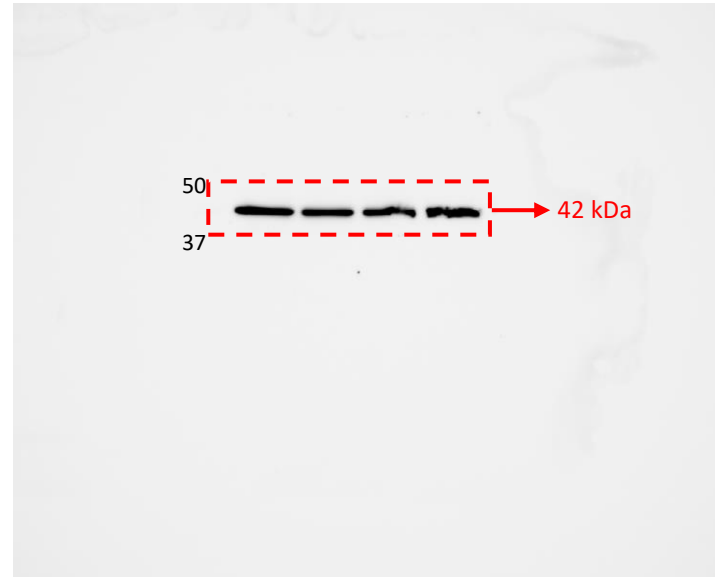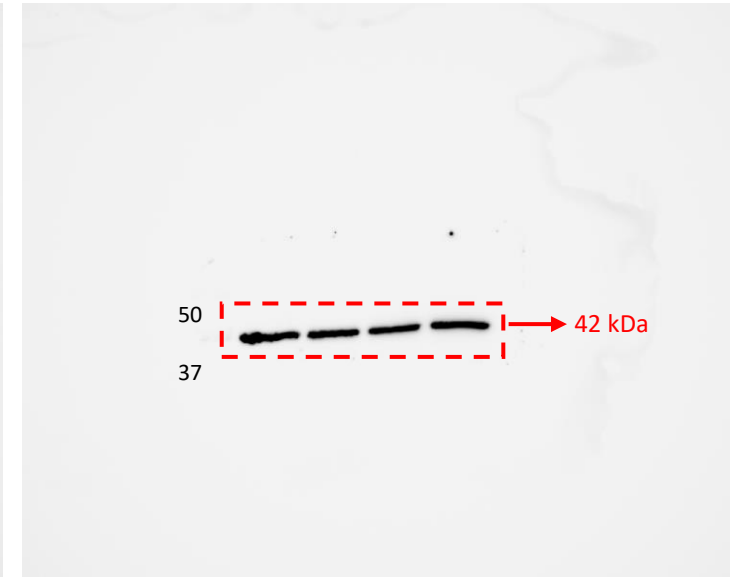

LC3B-II  
16kDa

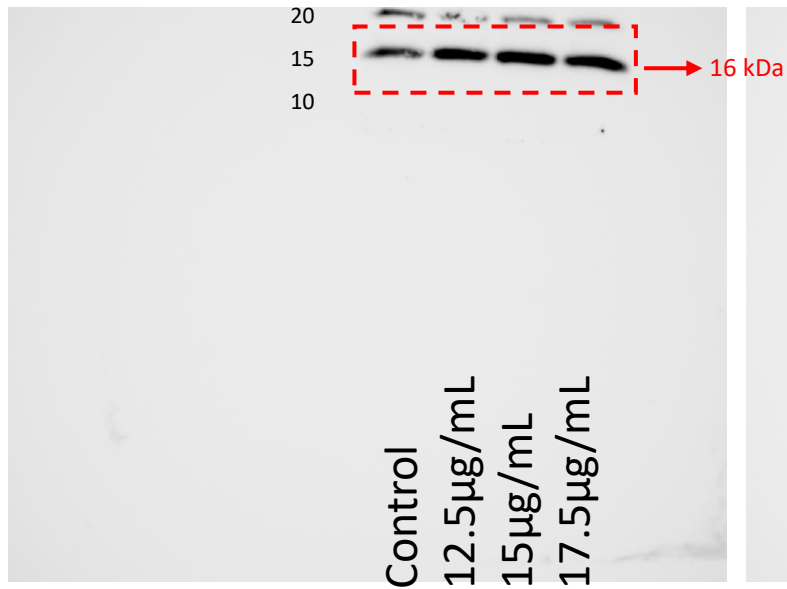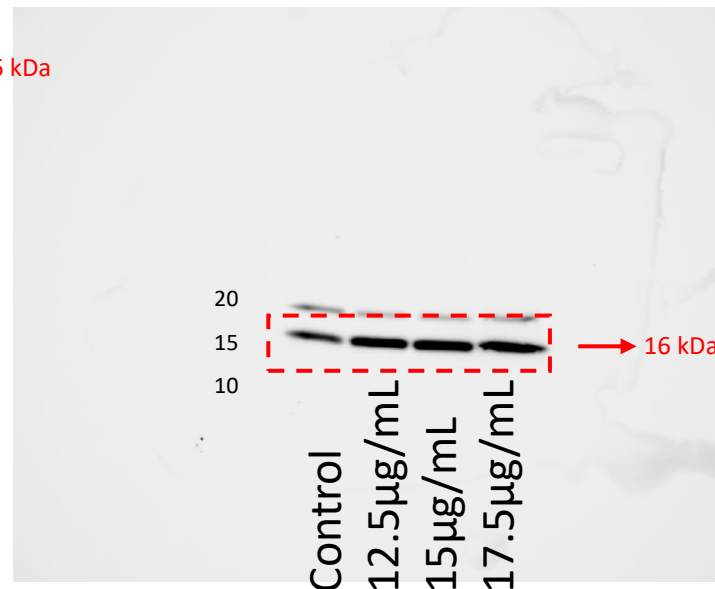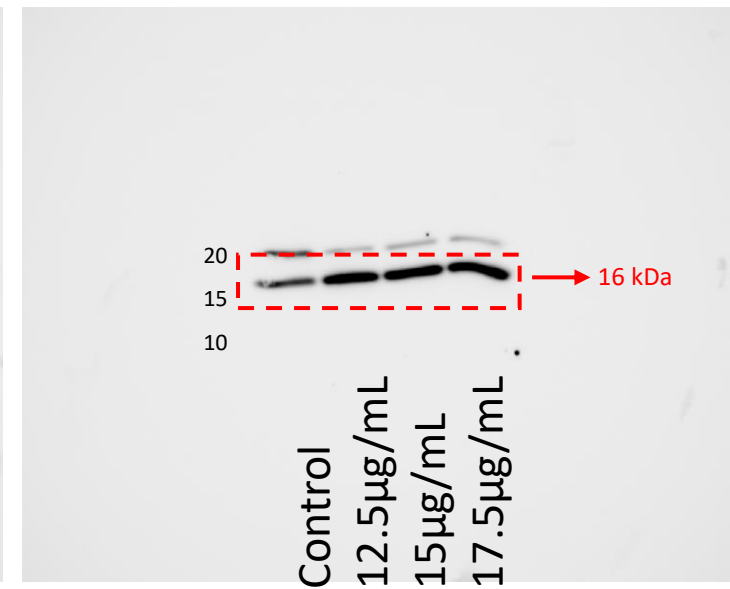

**Panel 20 represents western blot analysis shown in Fig. 6 A**

Repeat 1

Repeat 2

Repeat 3

$\beta$ -actin  
42kDa

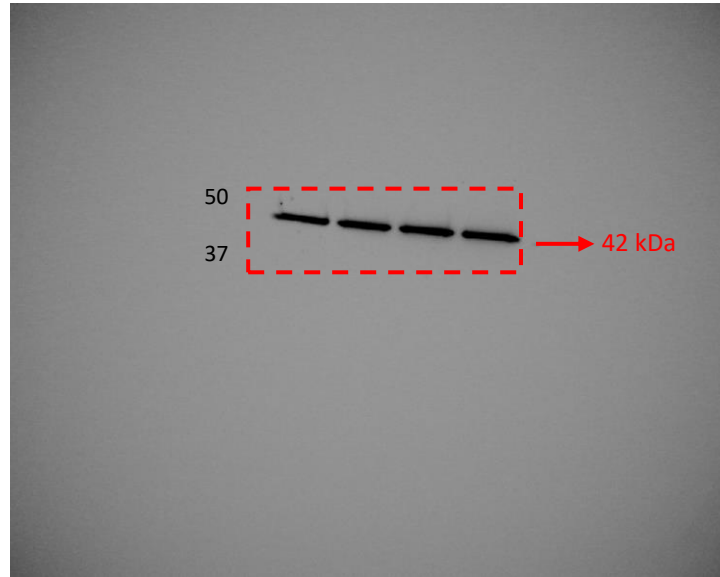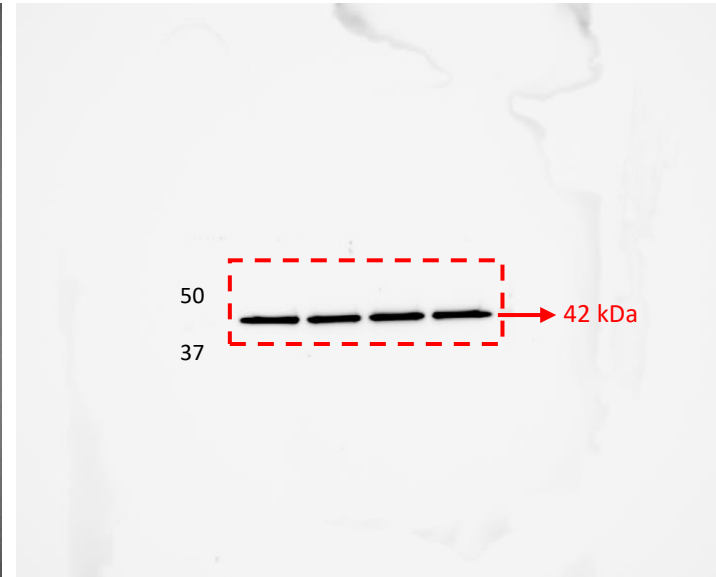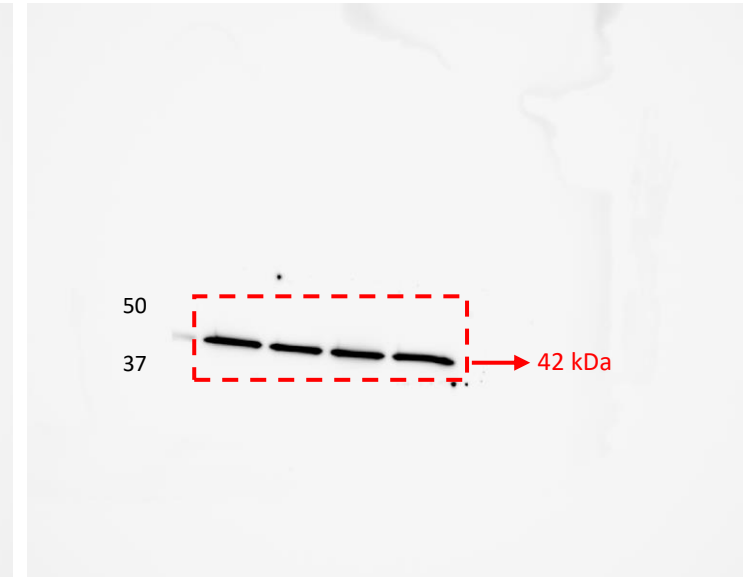

LC3B-II  
16kDa

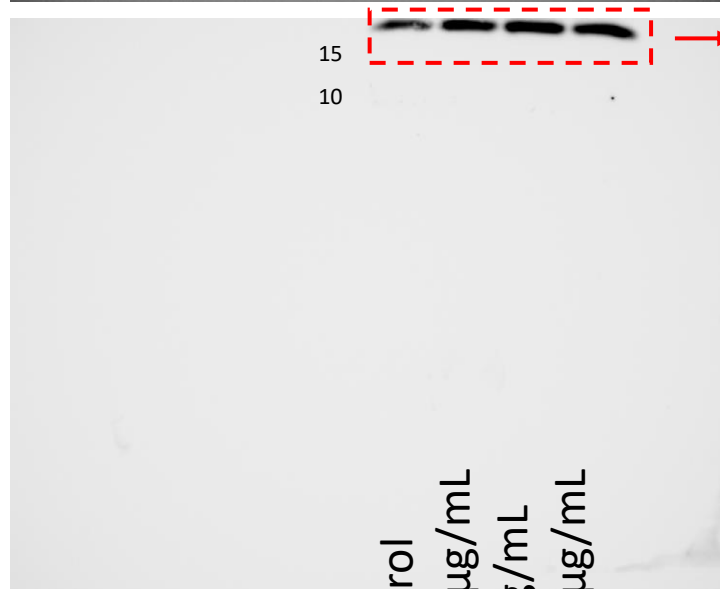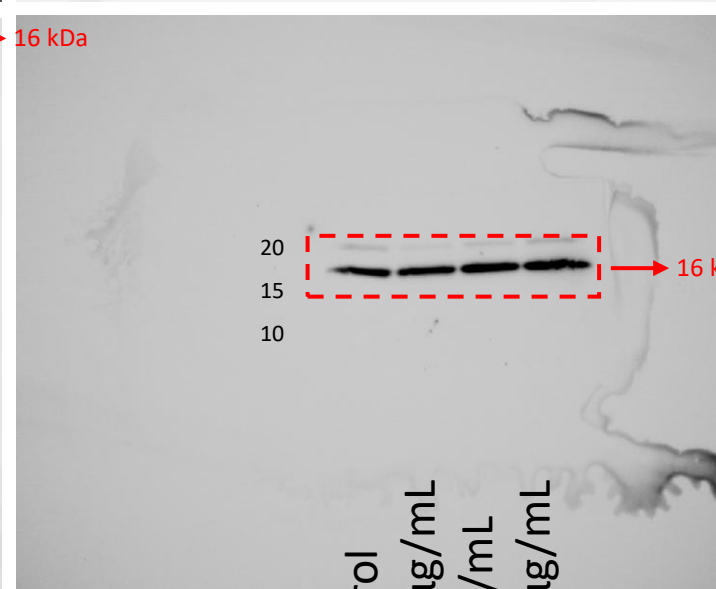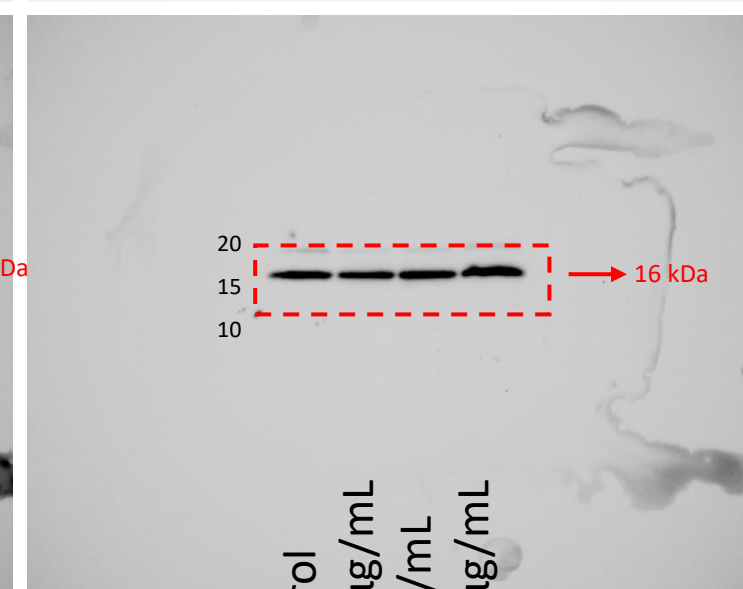

Control  
12.5  $\mu$ g/mL  
15  $\mu$ g/mL  
17.5  $\mu$ g/mL

Control  
12.5  $\mu$ g/mL  
15  $\mu$ g/mL  
17.5  $\mu$ g/mL

Control  
12.5  $\mu$ g/mL  
15  $\mu$ g/mL  
17.5  $\mu$ g/mL



**Panel 21 represents western blot analysis shown in Fig. 6 A**

Repeat 1

Repeat 2

Repeat 3

$\beta$ -actin  
42kDa

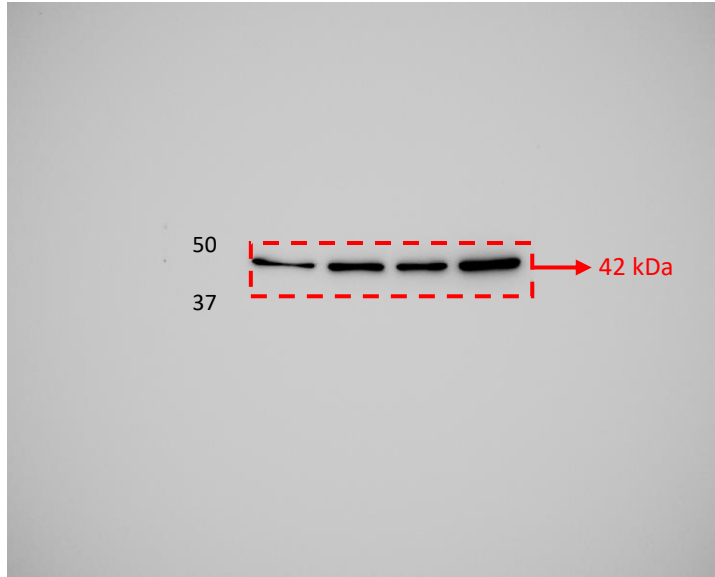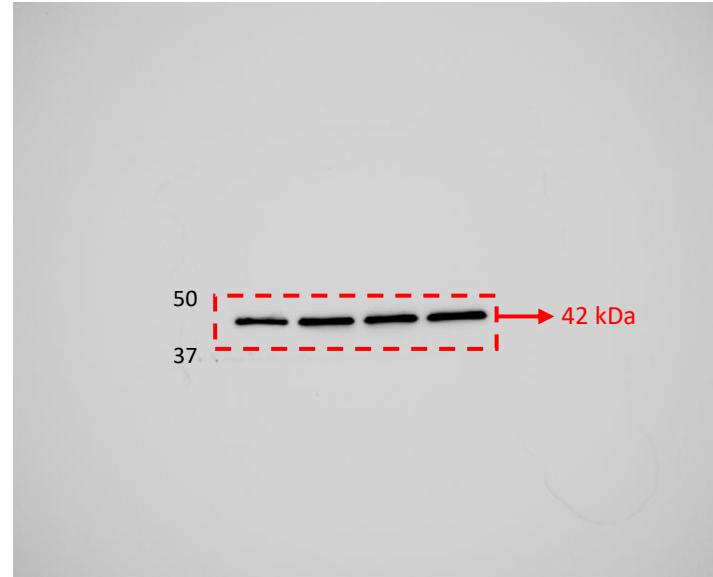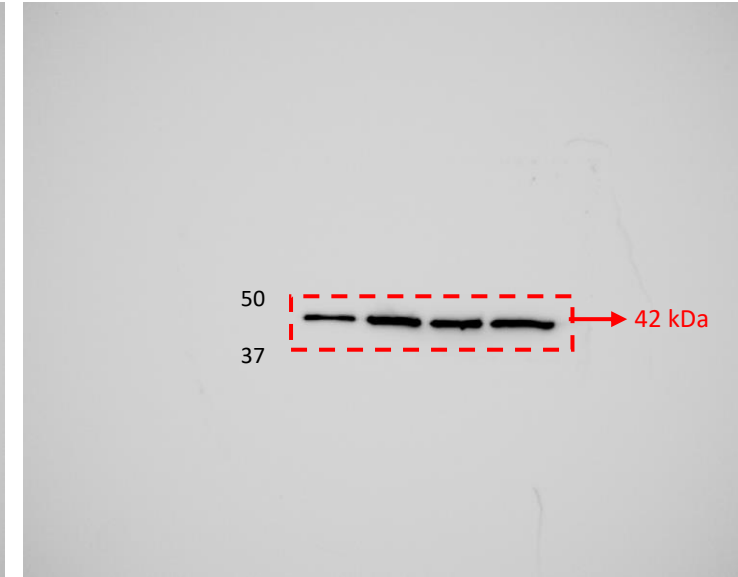

C-cas3  
17 kDa

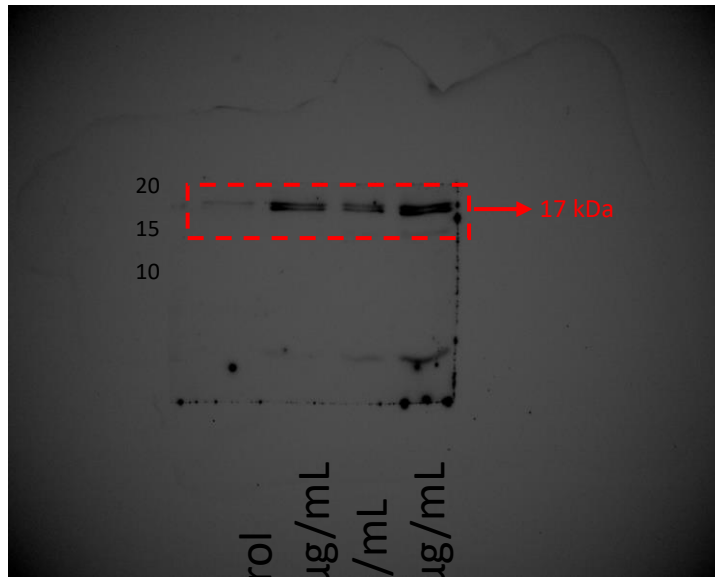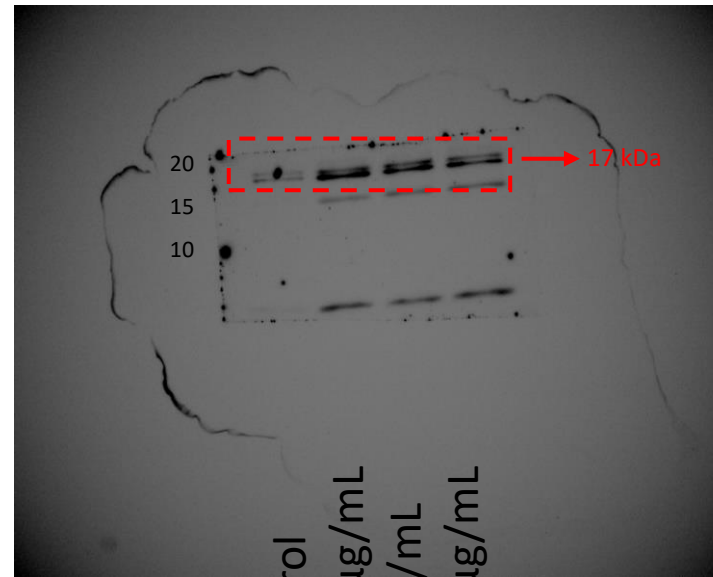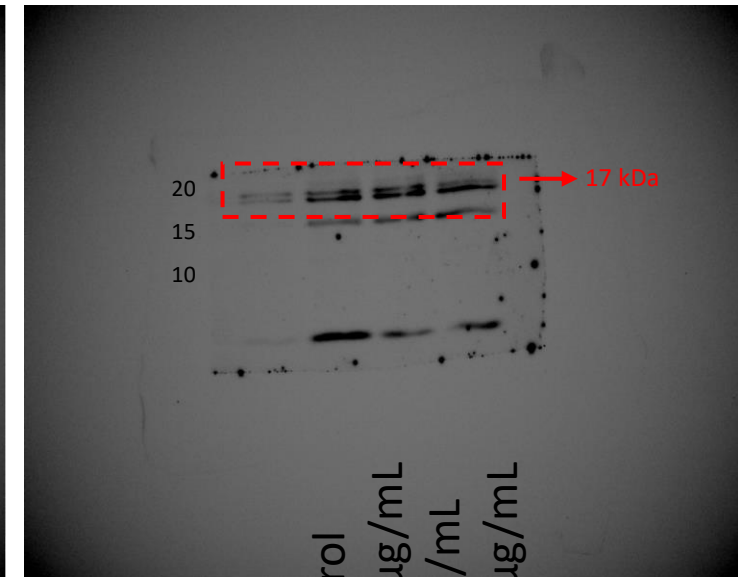

**Panel 22 represents western blot analysis shown in Fig. 6 A**

Repeat 1

Repeat 2

Repeat 3

$\beta$ -actin  
42kDa

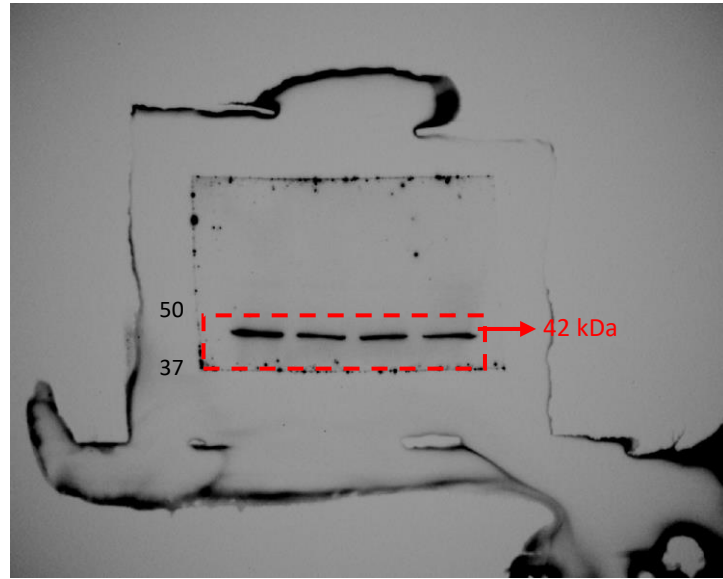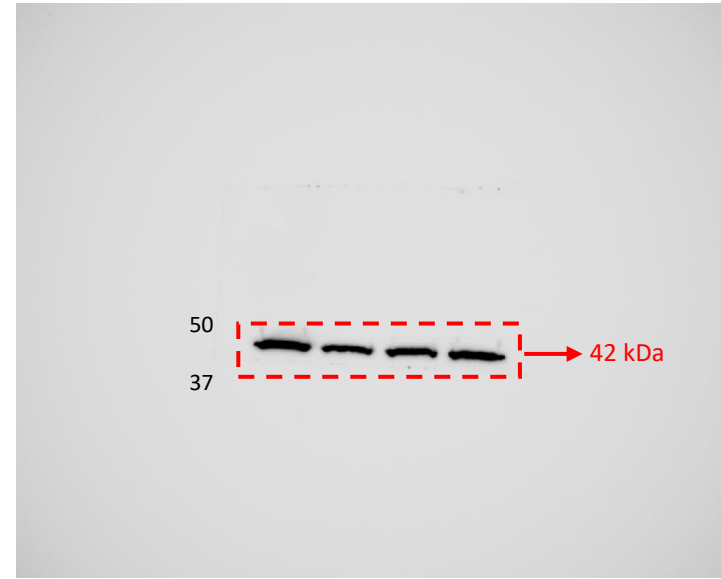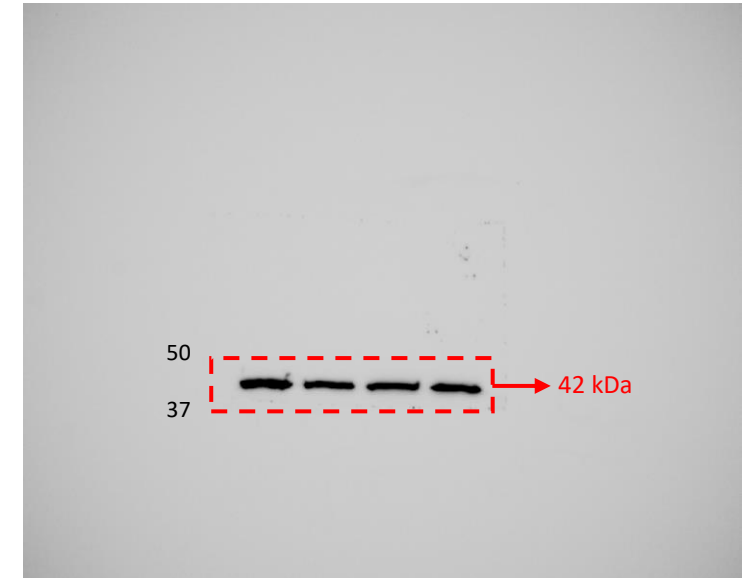

C-cas3  
17 kDa

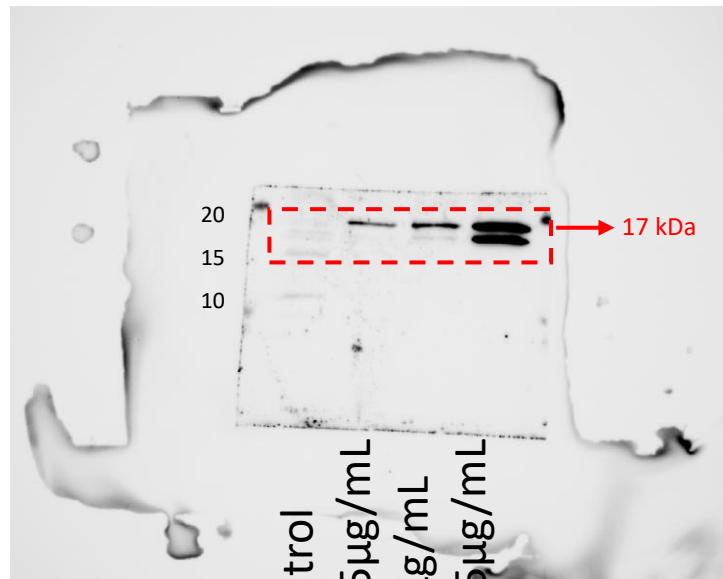

Control  
12.5 $\mu$ g/mL  
15 $\mu$ g/mL  
17.5 $\mu$ g/mL

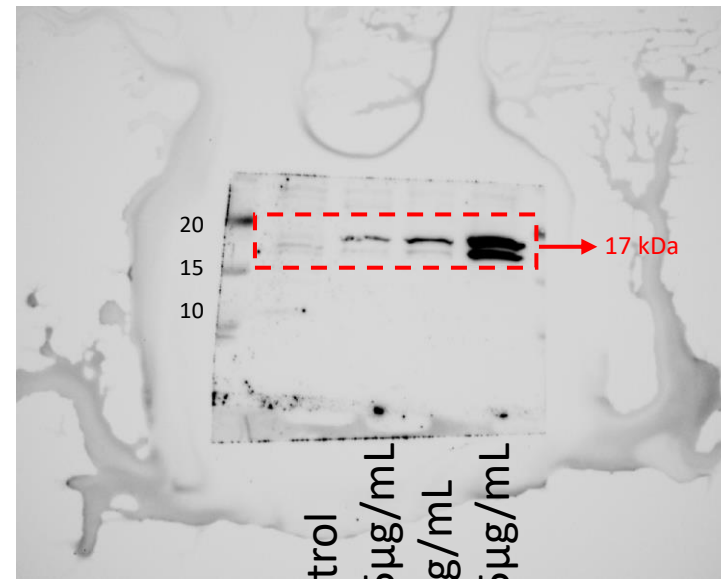

Control  
12.5 $\mu$ g/mL  
15 $\mu$ g/mL  
17.5 $\mu$ g/mL

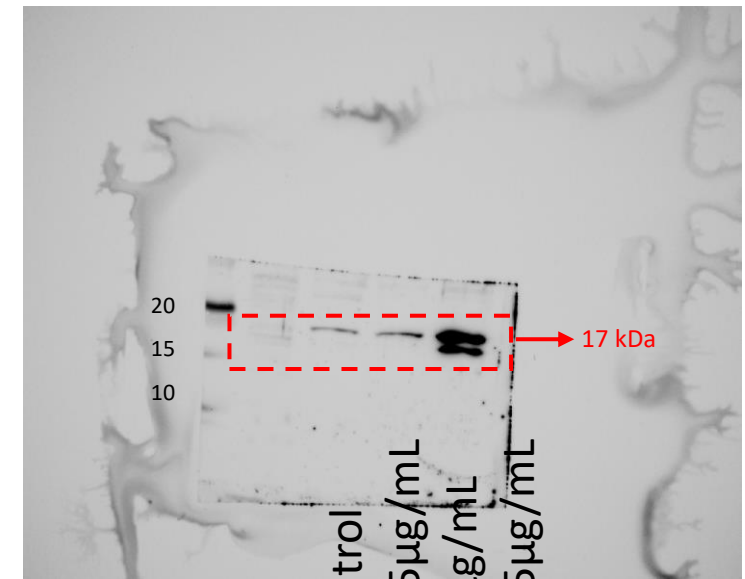

Control  
12.5 $\mu$ g/mL  
15 $\mu$ g/mL  
17.5 $\mu$ g/mL

**Full-length blots of proteins reported in Figure 7**

**Panel 23 represents western blot analysis shown in Fig. 7 D**

Repeat 1

Repeat 2

Repeat 3

MMP2  
72kDa

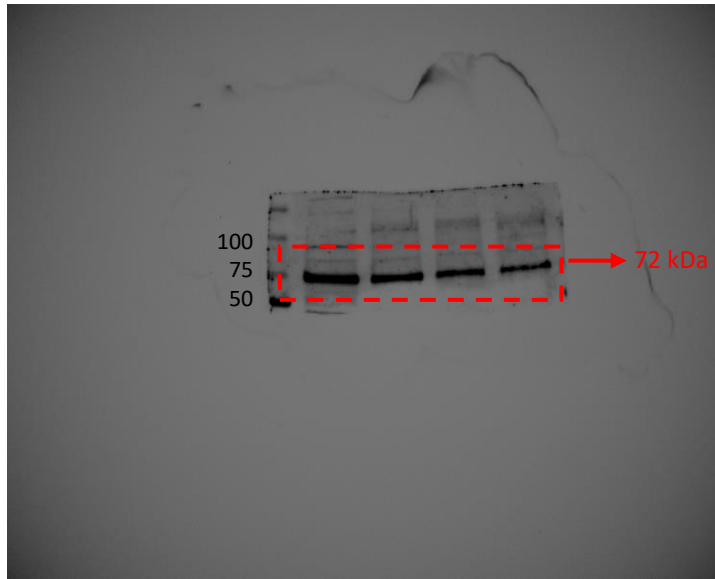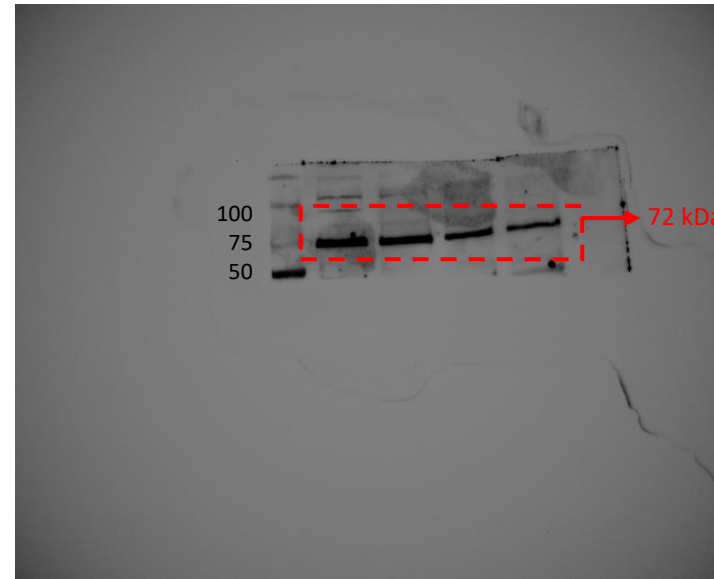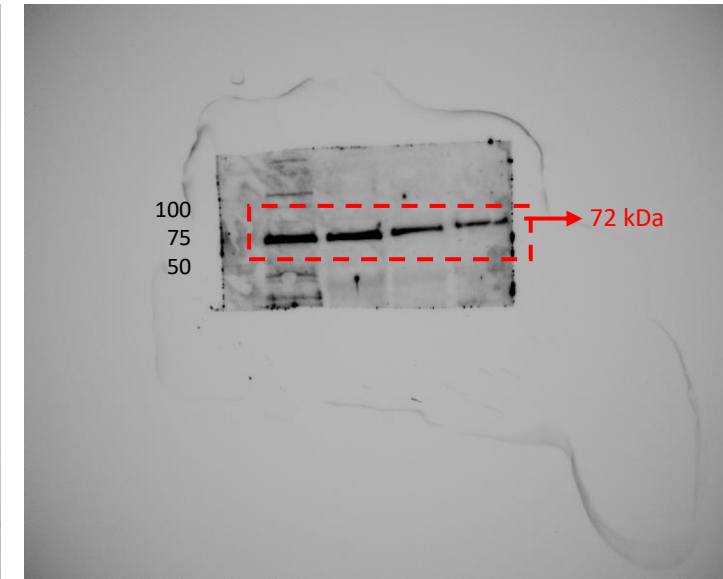

$\beta$ -actin  
42kDa

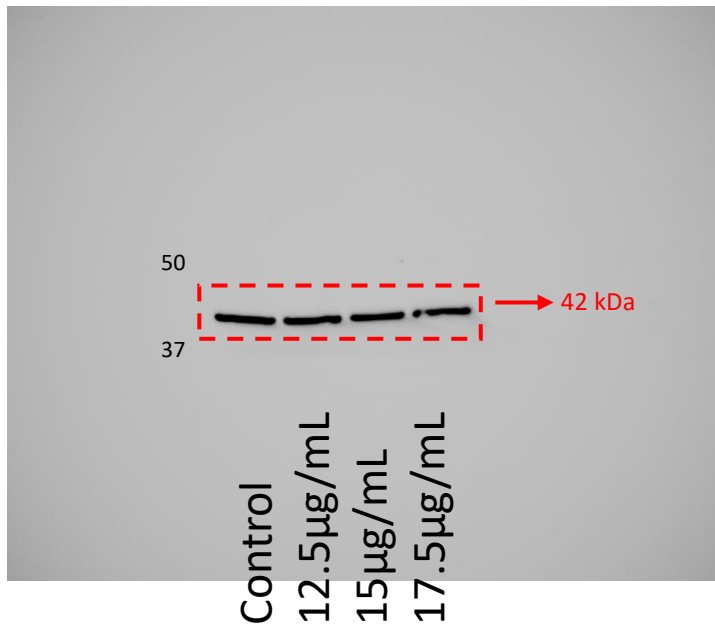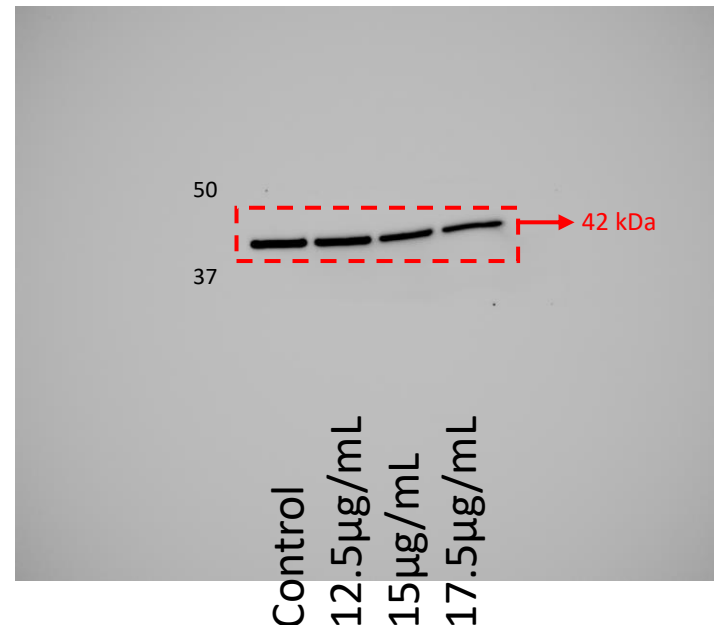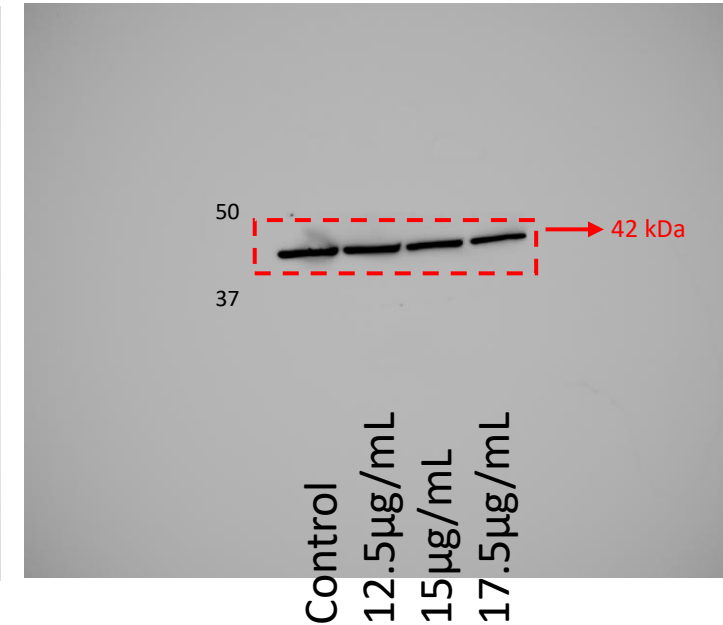

**Panel 24 represents western blot analysis shown in Fig. 7 D**

Repeat 1

MMP9  
92kDa

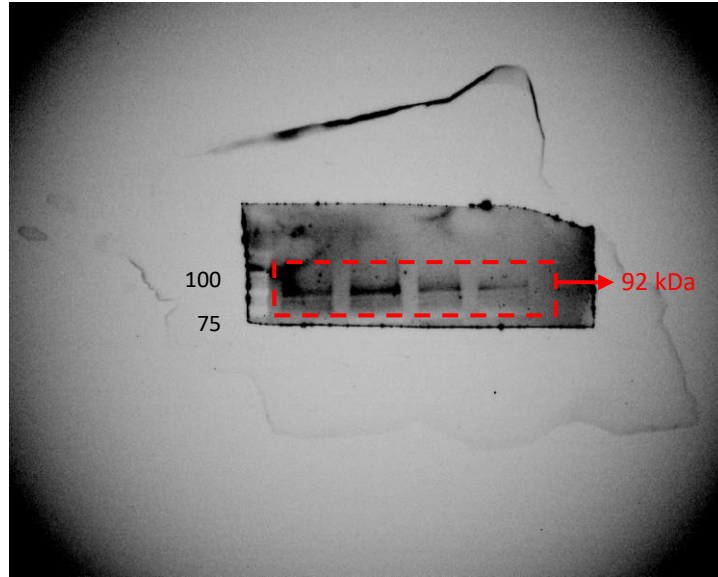

$\beta$ -actin  
42kDa

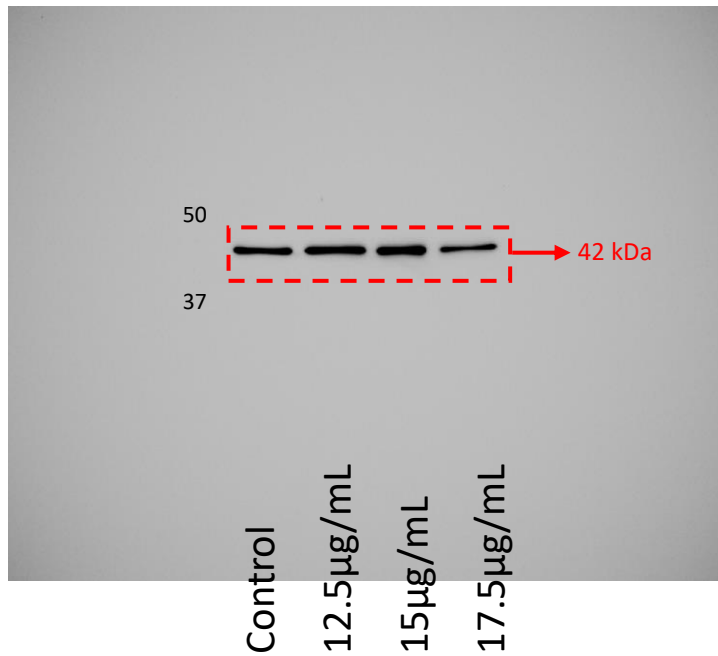

Repeat 2

MMP9  
92kDa

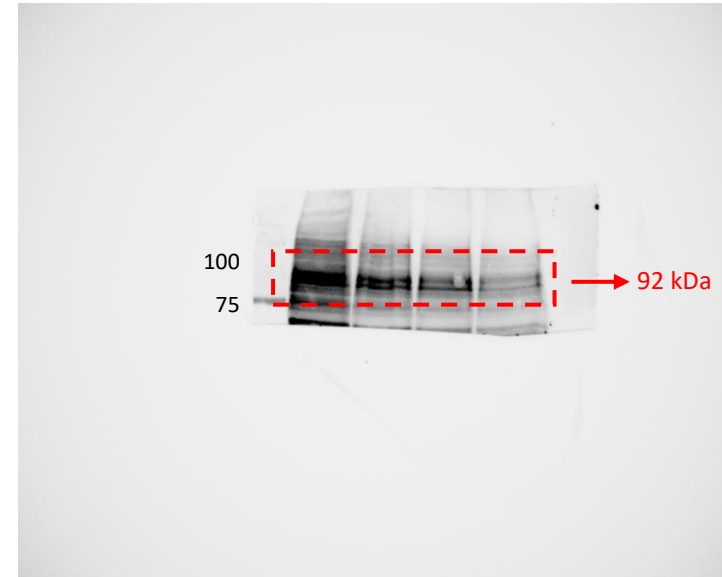

$\beta$ -actin  
42kDa

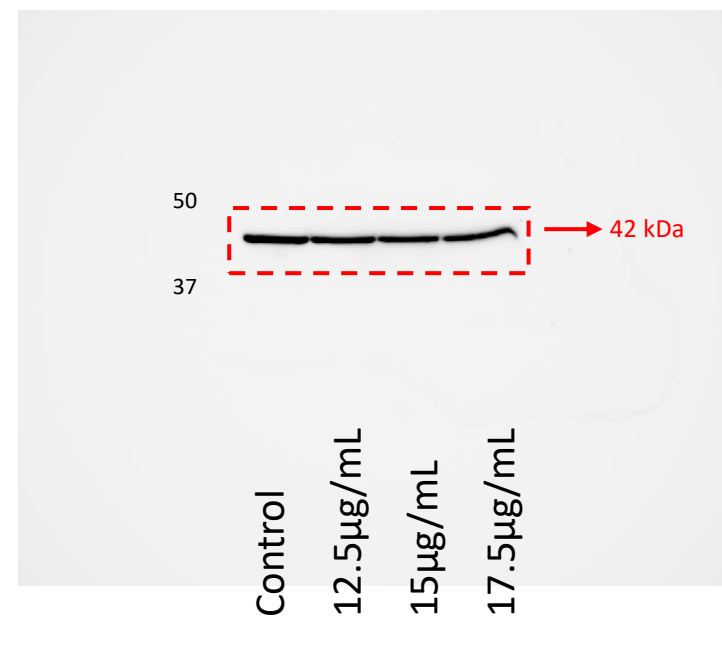

Supplement: 41598_2024_76340_MOESM1_ESM.pdf [file 41598_2024_76340_MOESM1_ESM.pdf]
