# Supplementary material for: The molecular anti-metastatic potential of CBD and THC from Lebanese Cannabis via apoptosis induction and alterations in autophagy
Source: PubMed Central journal article supplement — Sci Rep. 2024 Oct 27;14:25642. doi: 10.1038/s41598-024-76340-x (PMC11514238; doi:10.1038/s41598-024-76340-x), 2024-10-27
Supplement: 41598_2024_76340_MOESM2_ESM.pdf [file 41598_2024_76340_MOESM2_ESM.pdf]

**The molecular anti-metastatic potential of CBD and  
THC from Lebanese Cannabis via apoptosis induction  
and alterations in autophagy**

Supplementary information

*Supp Table 1: Chemical characterization of CBD/THC mixture (3:1) by GC-MS analysis.*

| Ret time | Start time | End time | Area     | %Area        | Height   | % Height | A/h  | Compound                                                                                   |
|----------|------------|----------|----------|--------------|----------|----------|------|--------------------------------------------------------------------------------------------|
| 61.132   | 60.99      | 61.255   | 2.1E+08  | <b>75.66</b> | 39289047 | 74.99    | 5.36 | 1,3-BENZENEDIOL, 2-[3-METHYL-6-(1-METHYLETHENYL)-2-CYCLOHEXEN-1-YL]-5-PENTYL-, (1R-TRANS)- |
| 63.879   | 63.775     | 63.99    | 67715260 | <b>24.34</b> | 13104475 | 25.01    | 5.17 | 6,6,9-TRIMETHYL-3-PENTYL-6A,7,8,10A-TETRAHYDRO-6H-BENZO[C]CHROMEN-1-OL                     |

*Supp Fig 1: GC/MS chromatogram of the chemical constituents' CBD/THC (3:1) in the purified prepared extract.*

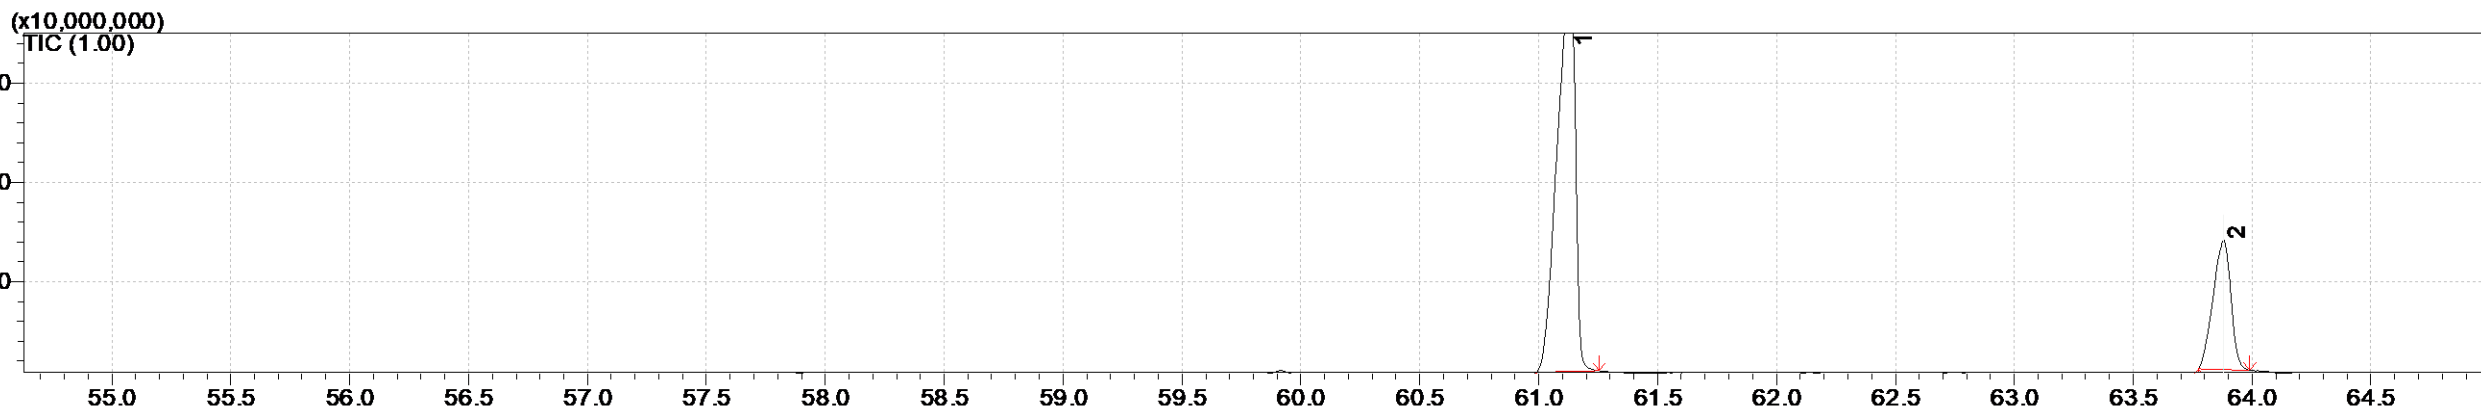

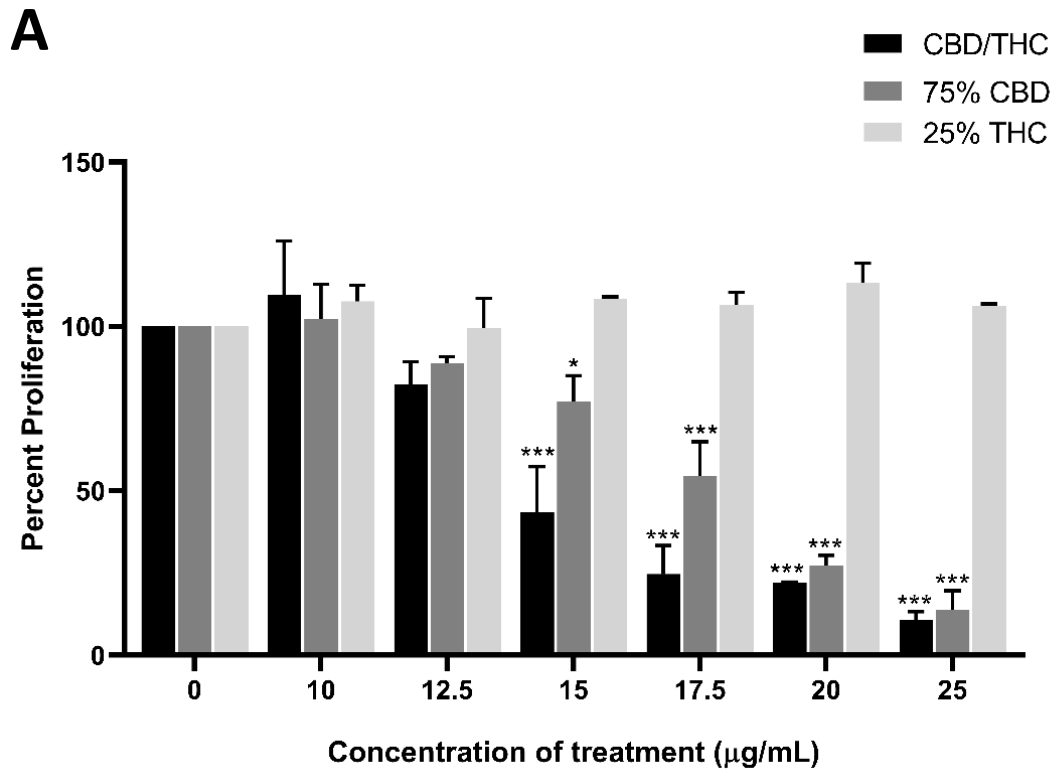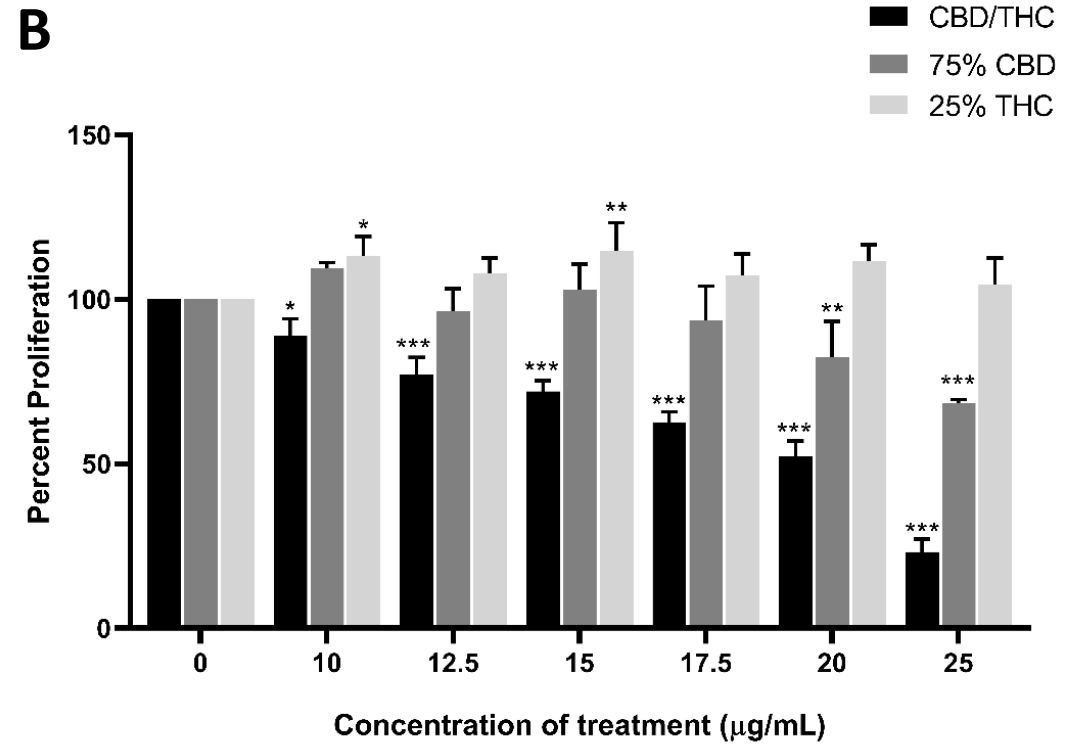

*Supp Fig 2: Cytotoxicity assay of MDA-MB-231 (A) and MCF-7 (B) cells treated with CBD/THC (3:1) mixture, CBD alone or THC alone at their respective concentrations for 24hours. Data represents mean  $\pm$  SD from three independent experiments. Statistical significance reported as \* corresponds to p-value < 0.05, \*\* corresponds to p-value < 0.01, and \*\*\* corresponds to p-value < 0.001*
